# Supplementary material
Source: ML conference proceedings conference paper supplement (https://openreview.net/forum?id=8DBTq09LgN)

# Learning to Synthesize Programs as Interpretable and Generalizable Policies

---

Dweep Trivedi\*, Jesse Zhang\*, Shao-Hua Sun\*, Joseph J Lim

University of Southern California

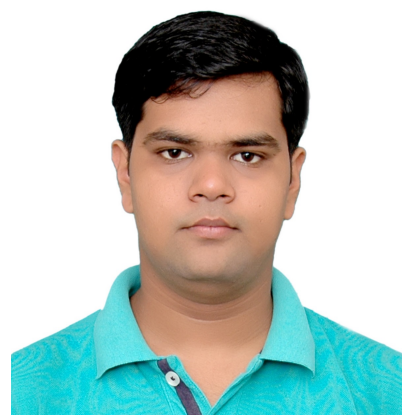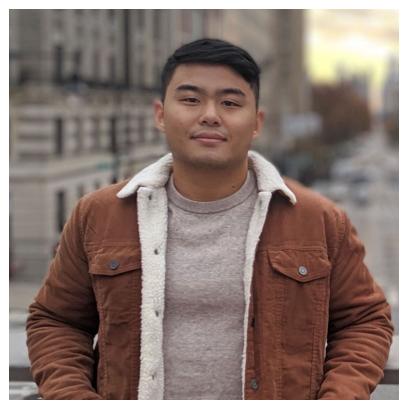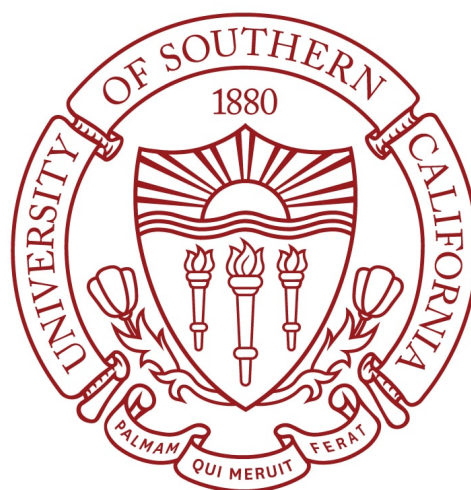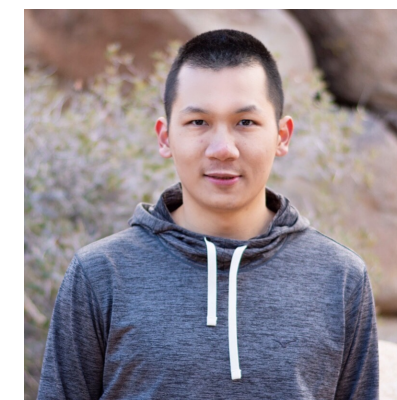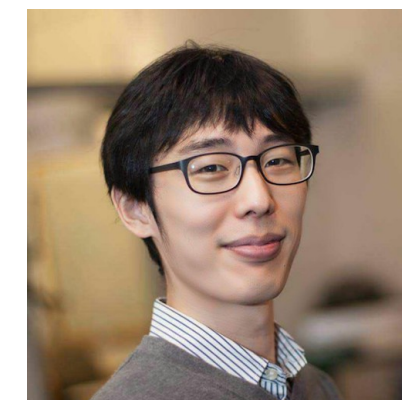

# Advances in Deep Reinforcement Learning

---

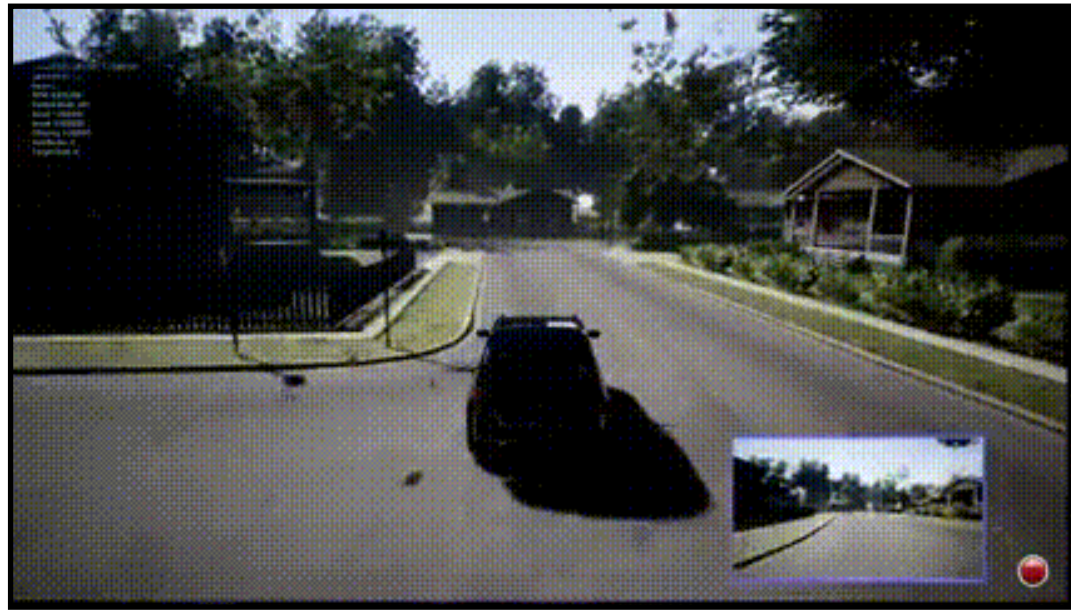

Autonomous Driving

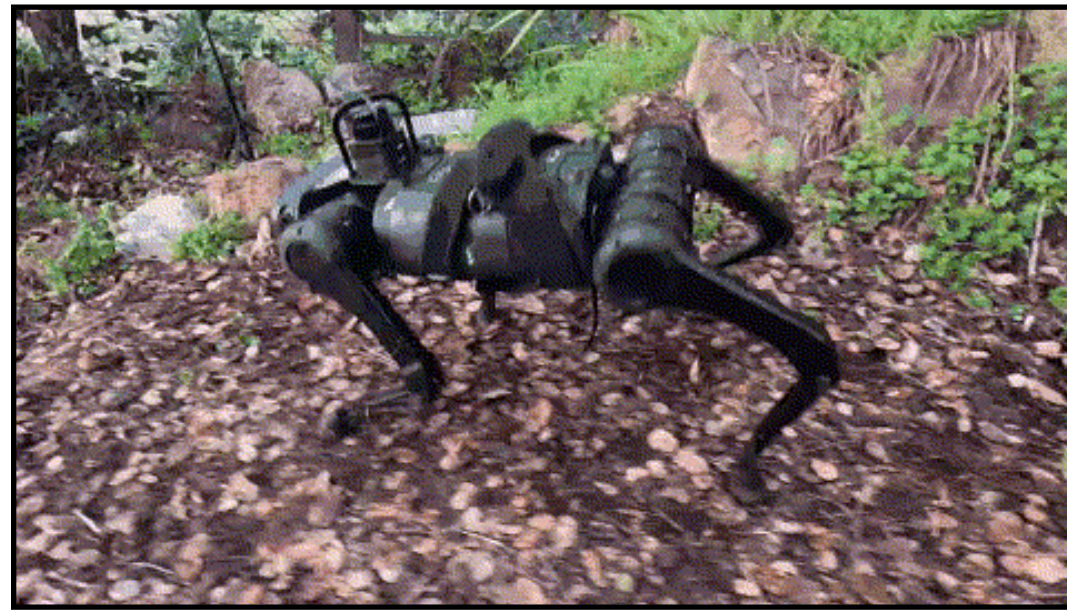

Robotics

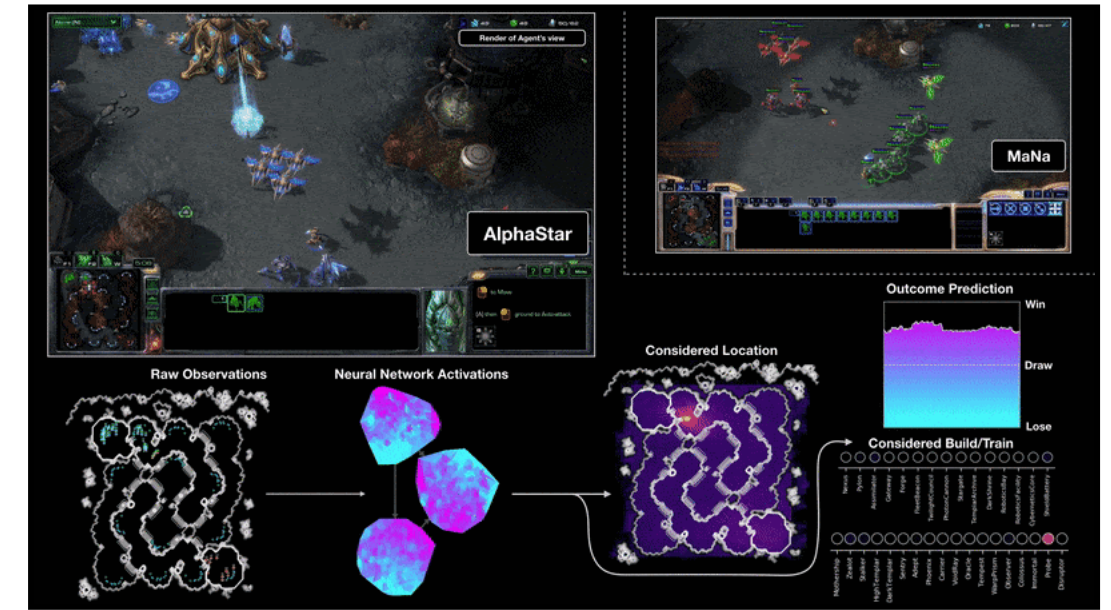

Game AI

Execute

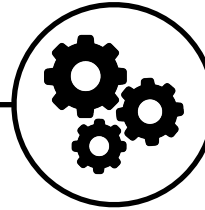

Environment

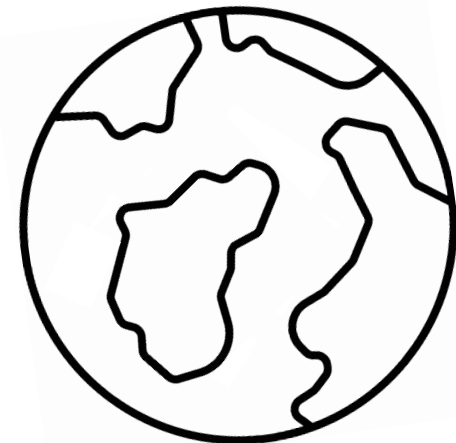

Deep Neural Network

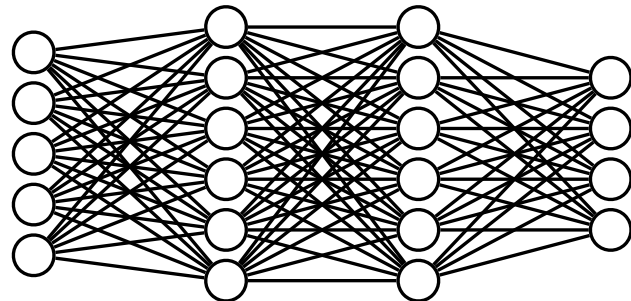

Reward

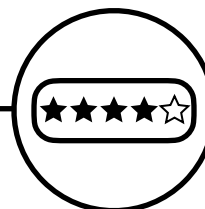

# Issues with Deep Reinforcement Learning (DRL)

---

## Generalization

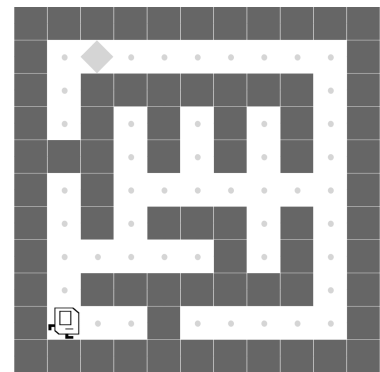

Simple task

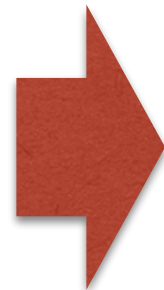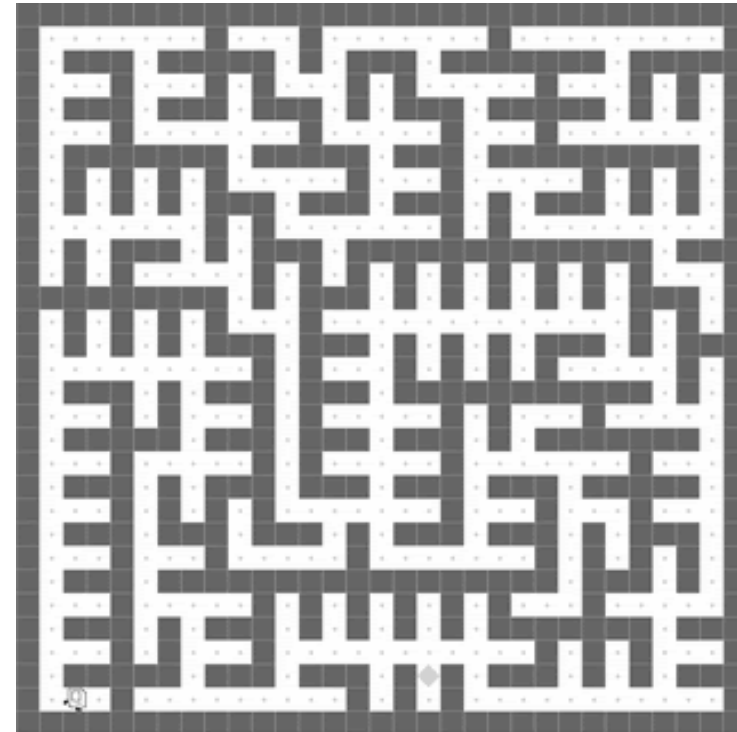

Complex task

## Interpretability

Trust

Safety

Contestability

Execute



Environment



Reward

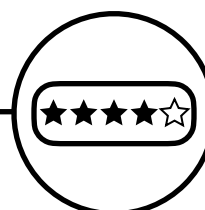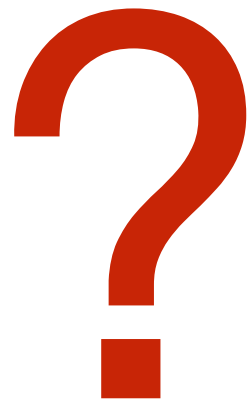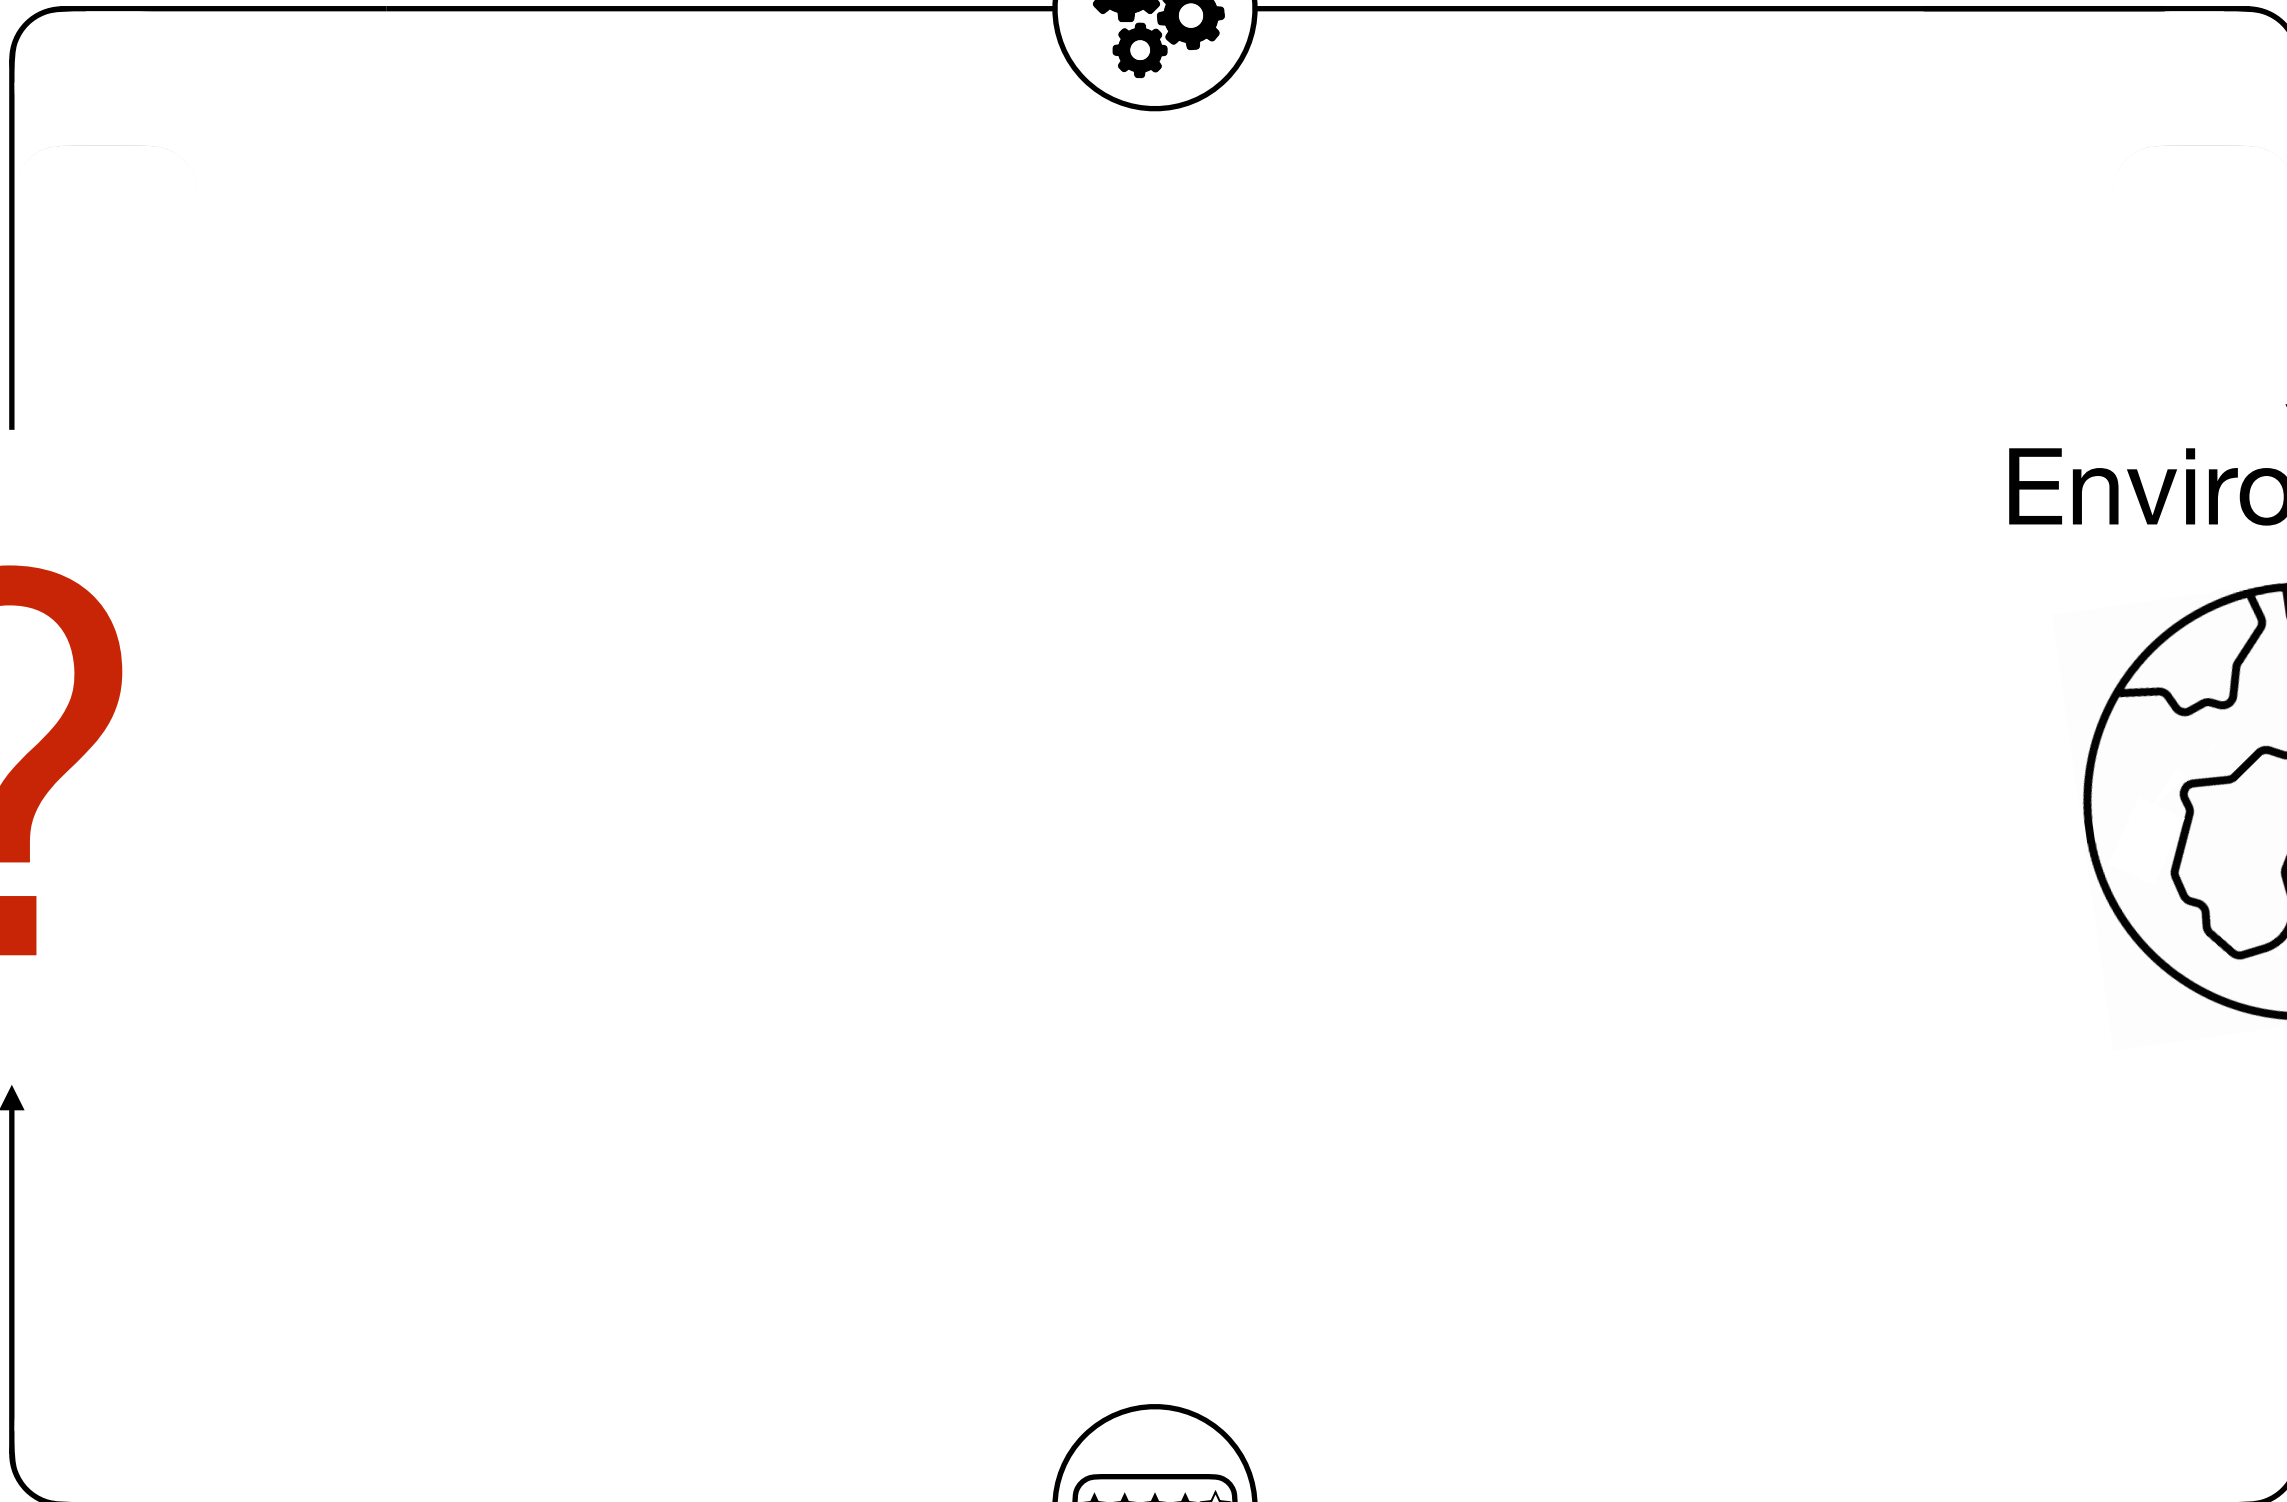

# Programmatic Reinforcement Learning

---

## Decision Trees

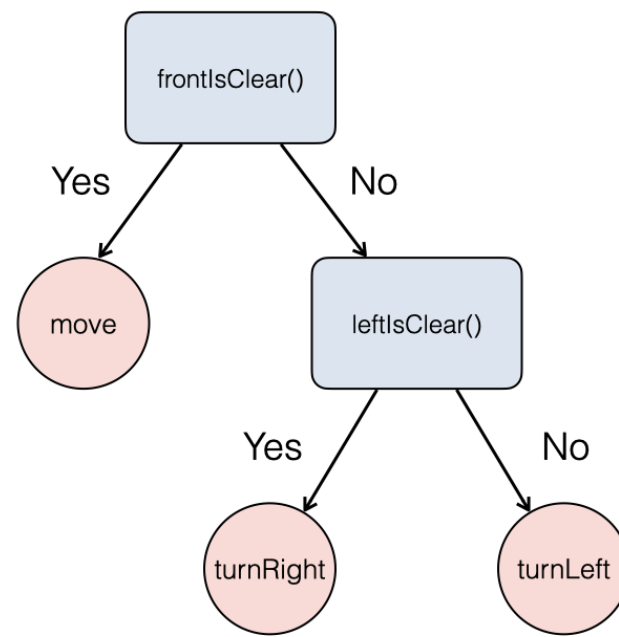

- Hard to represent repetitive behaviors

## State Machines

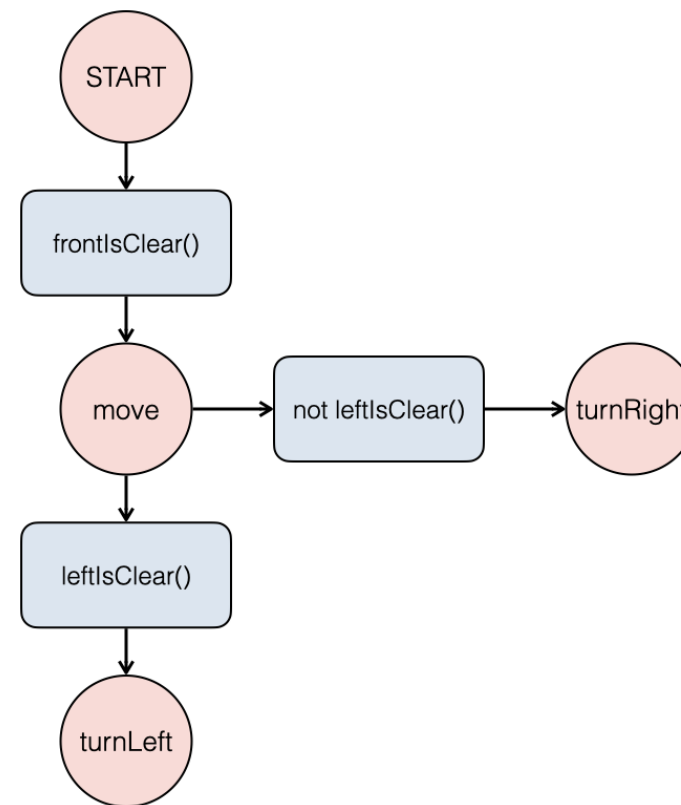

- Difficult to scale

## Programs

```
DEF run()  
  IF frontIsClear()  
    move  
  ELSE  
    IF frontIsClear()  
      turnLeft  
    ELSE  
      turnRight
```

- Flexible
- Human readable
- Hard to synthesize

# Execute



# Environment

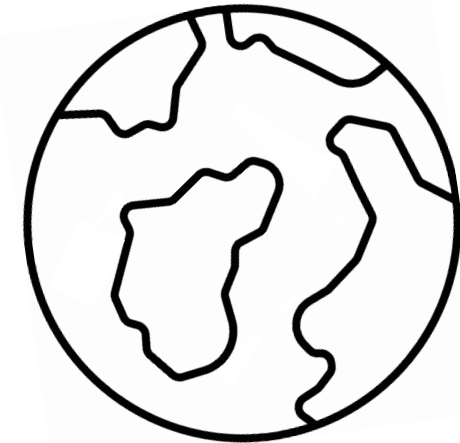

# Reward



```
DEF run()  
  IF frontIsClear()  
    move  
  ELSE  
    IF frontIsClear()  
      turnLeft  
    ELSE  
      turnRight
```

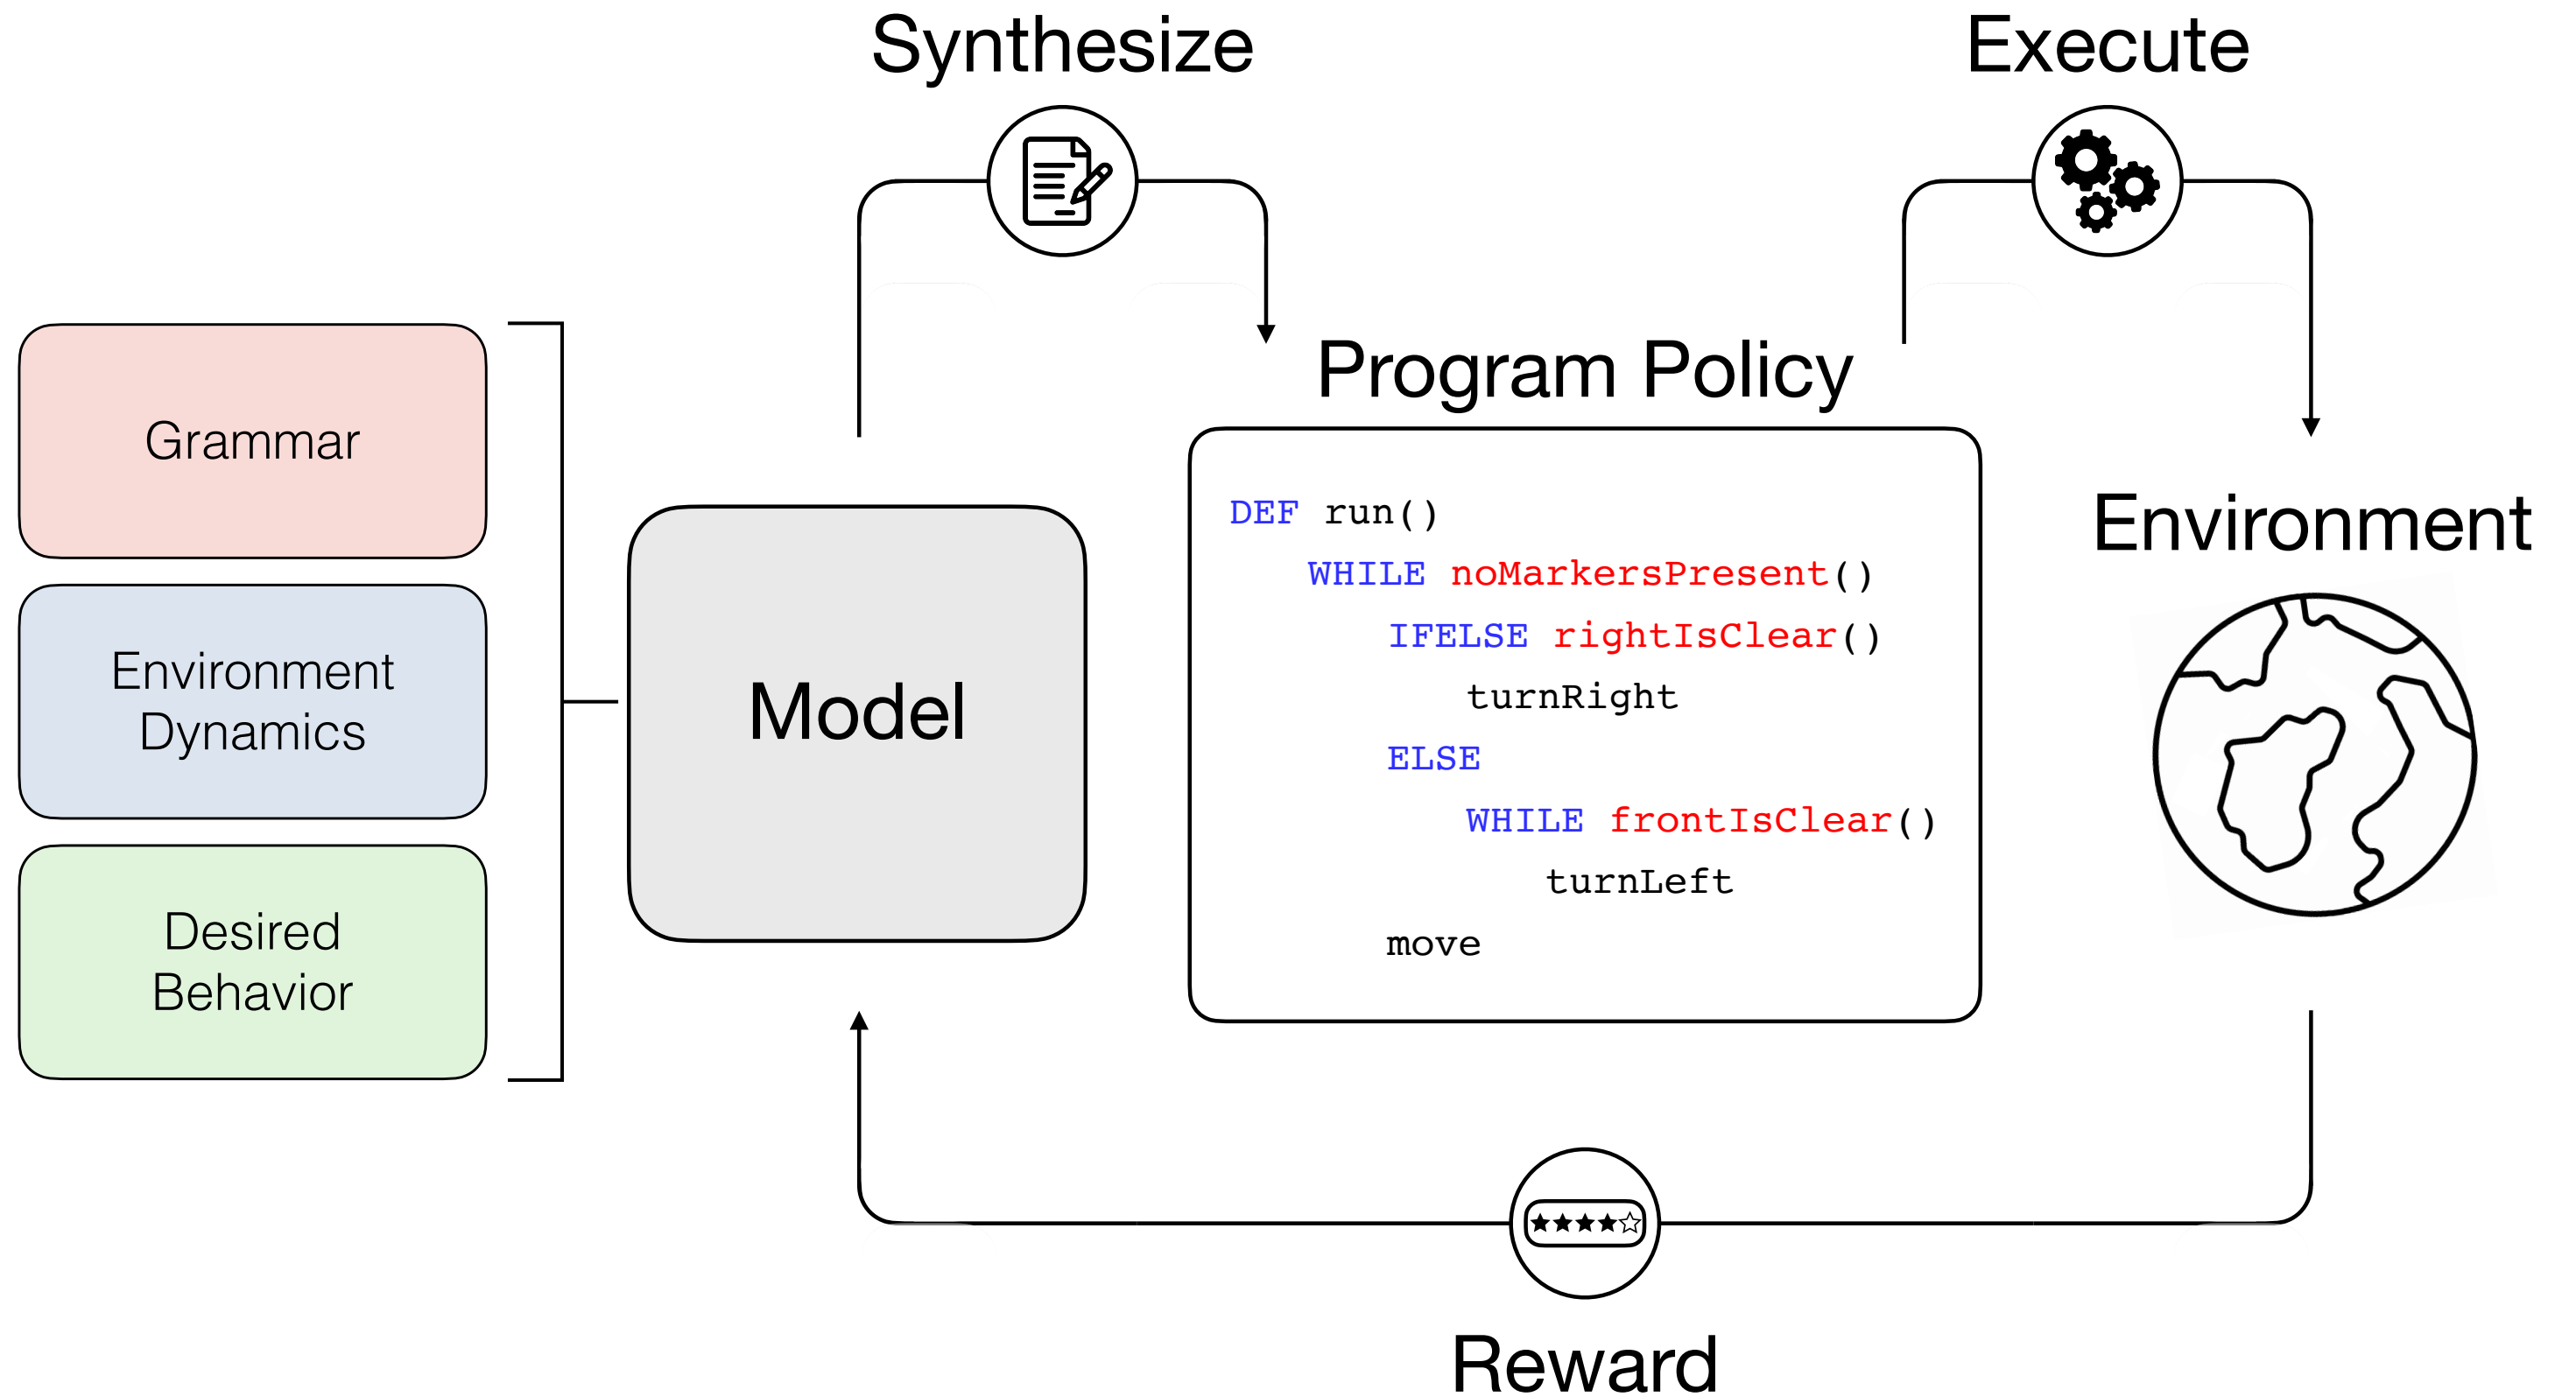

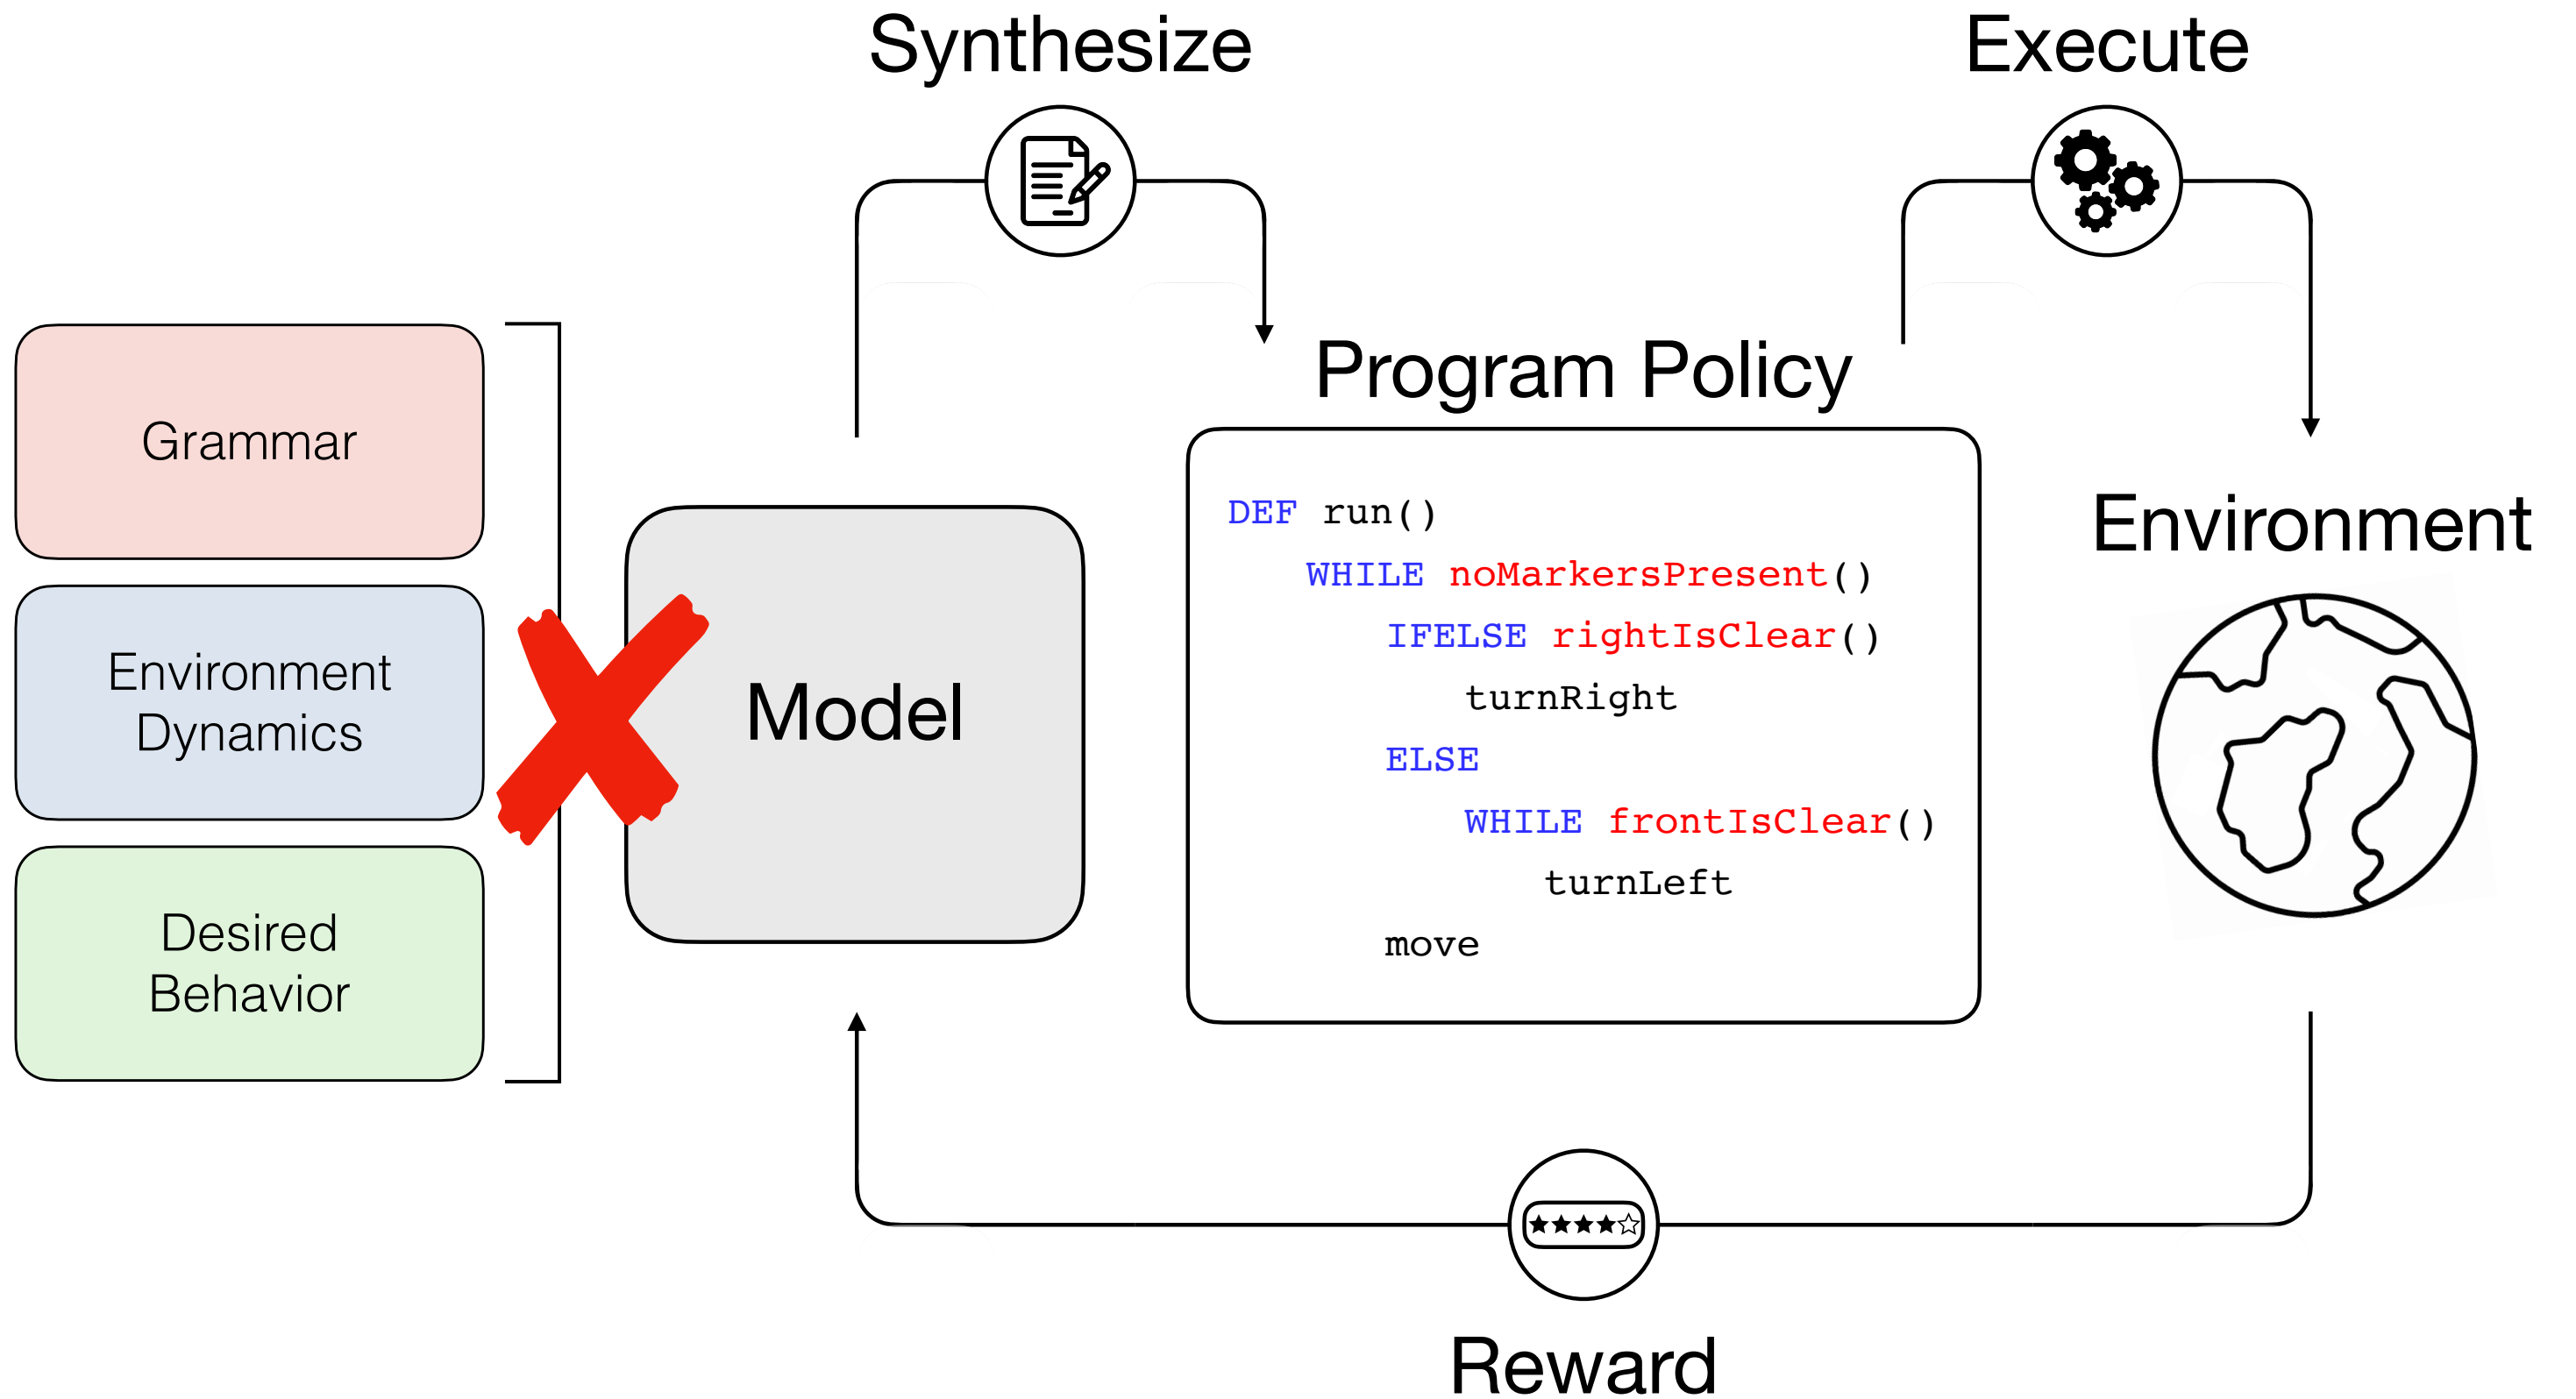

# LEAPS: **L**earning **E**MBEDdings for **I**ntent **P**rogram **S**ynthesis

## Stage 1

Learning a program embedding space from a set of randomly generated programs

Grammar

Environment  
Dynamics

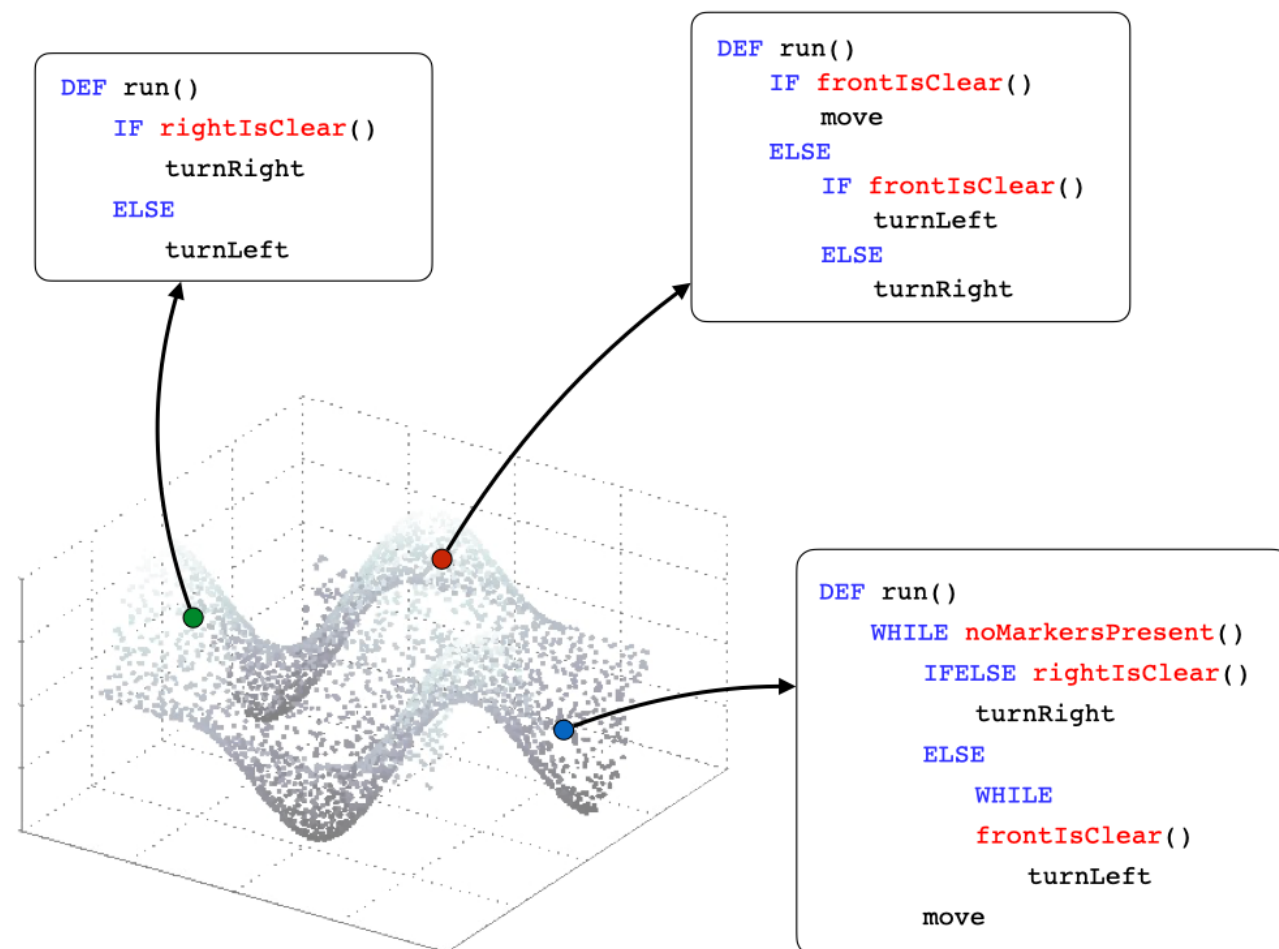

## Stage 2

Searching for a task-solving program

Desired  
Behavior

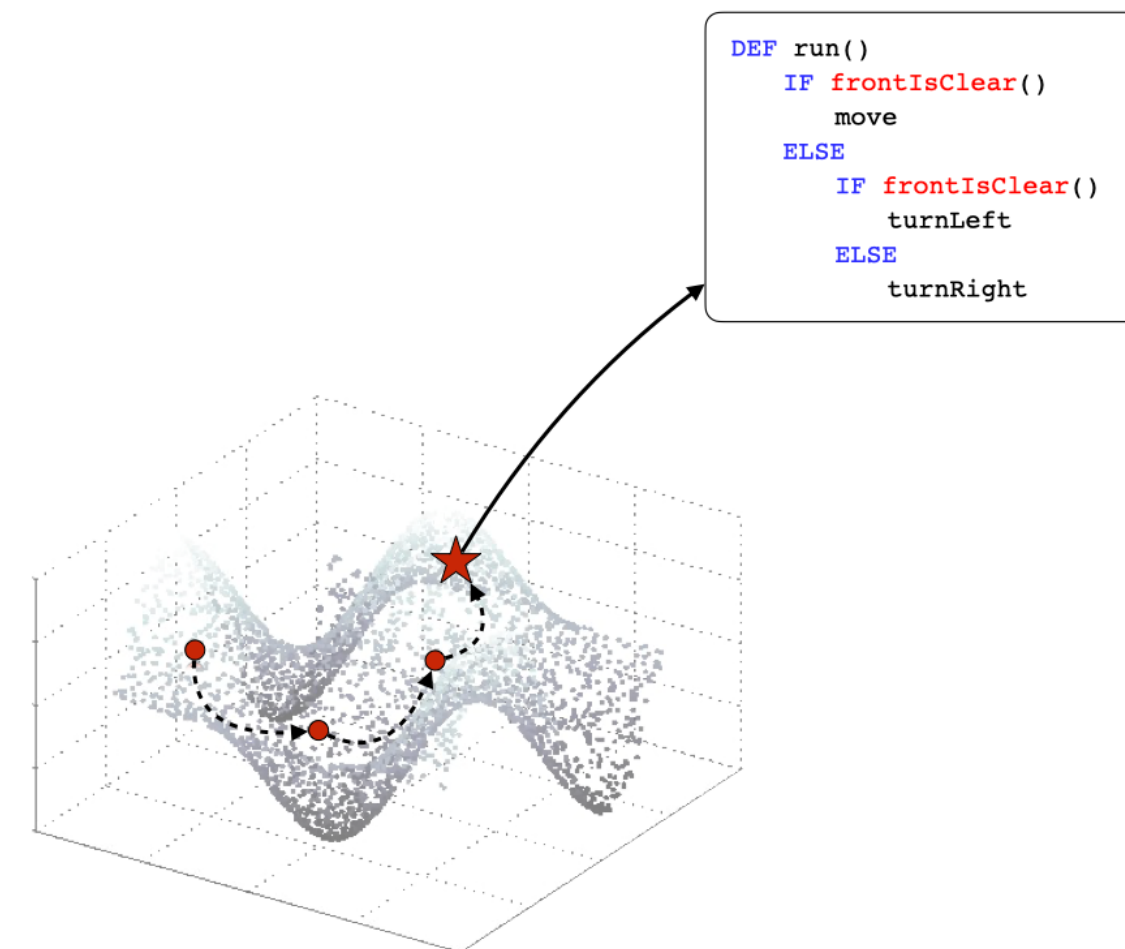

# Learning a Program Embedding Space

---

# Latent Program Search with Cross-Entropy Method

---

Cross Entropy Method

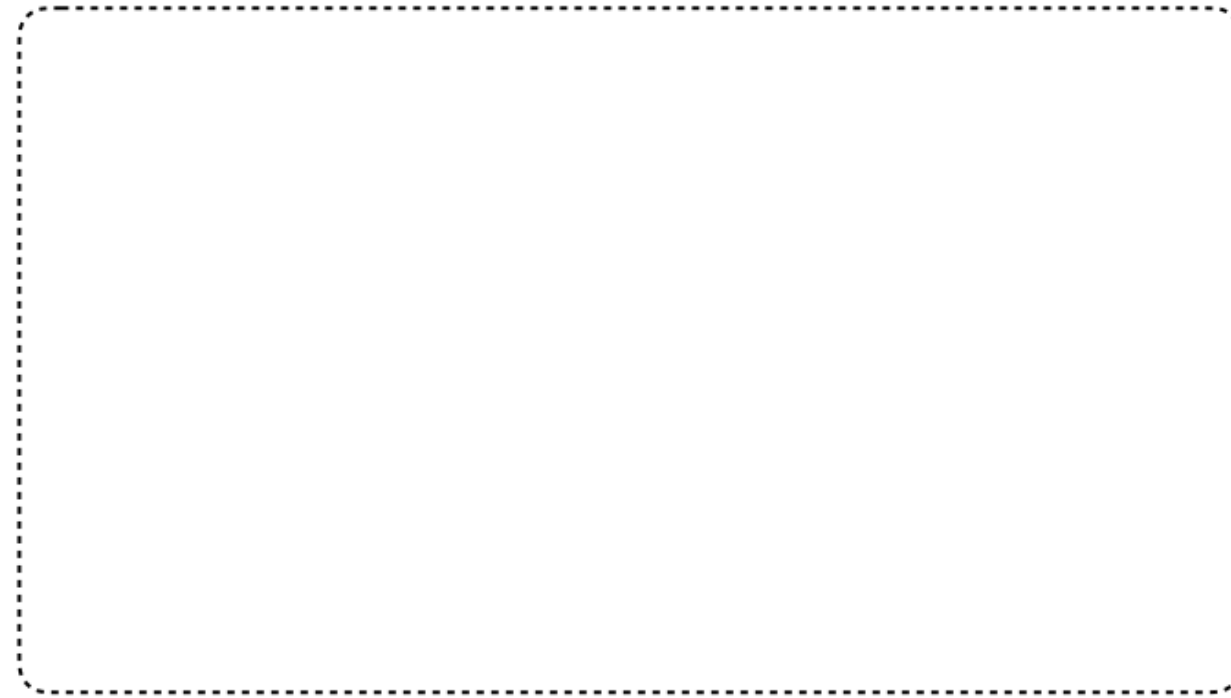

# Latent Program Search with Cross-Entropy Method

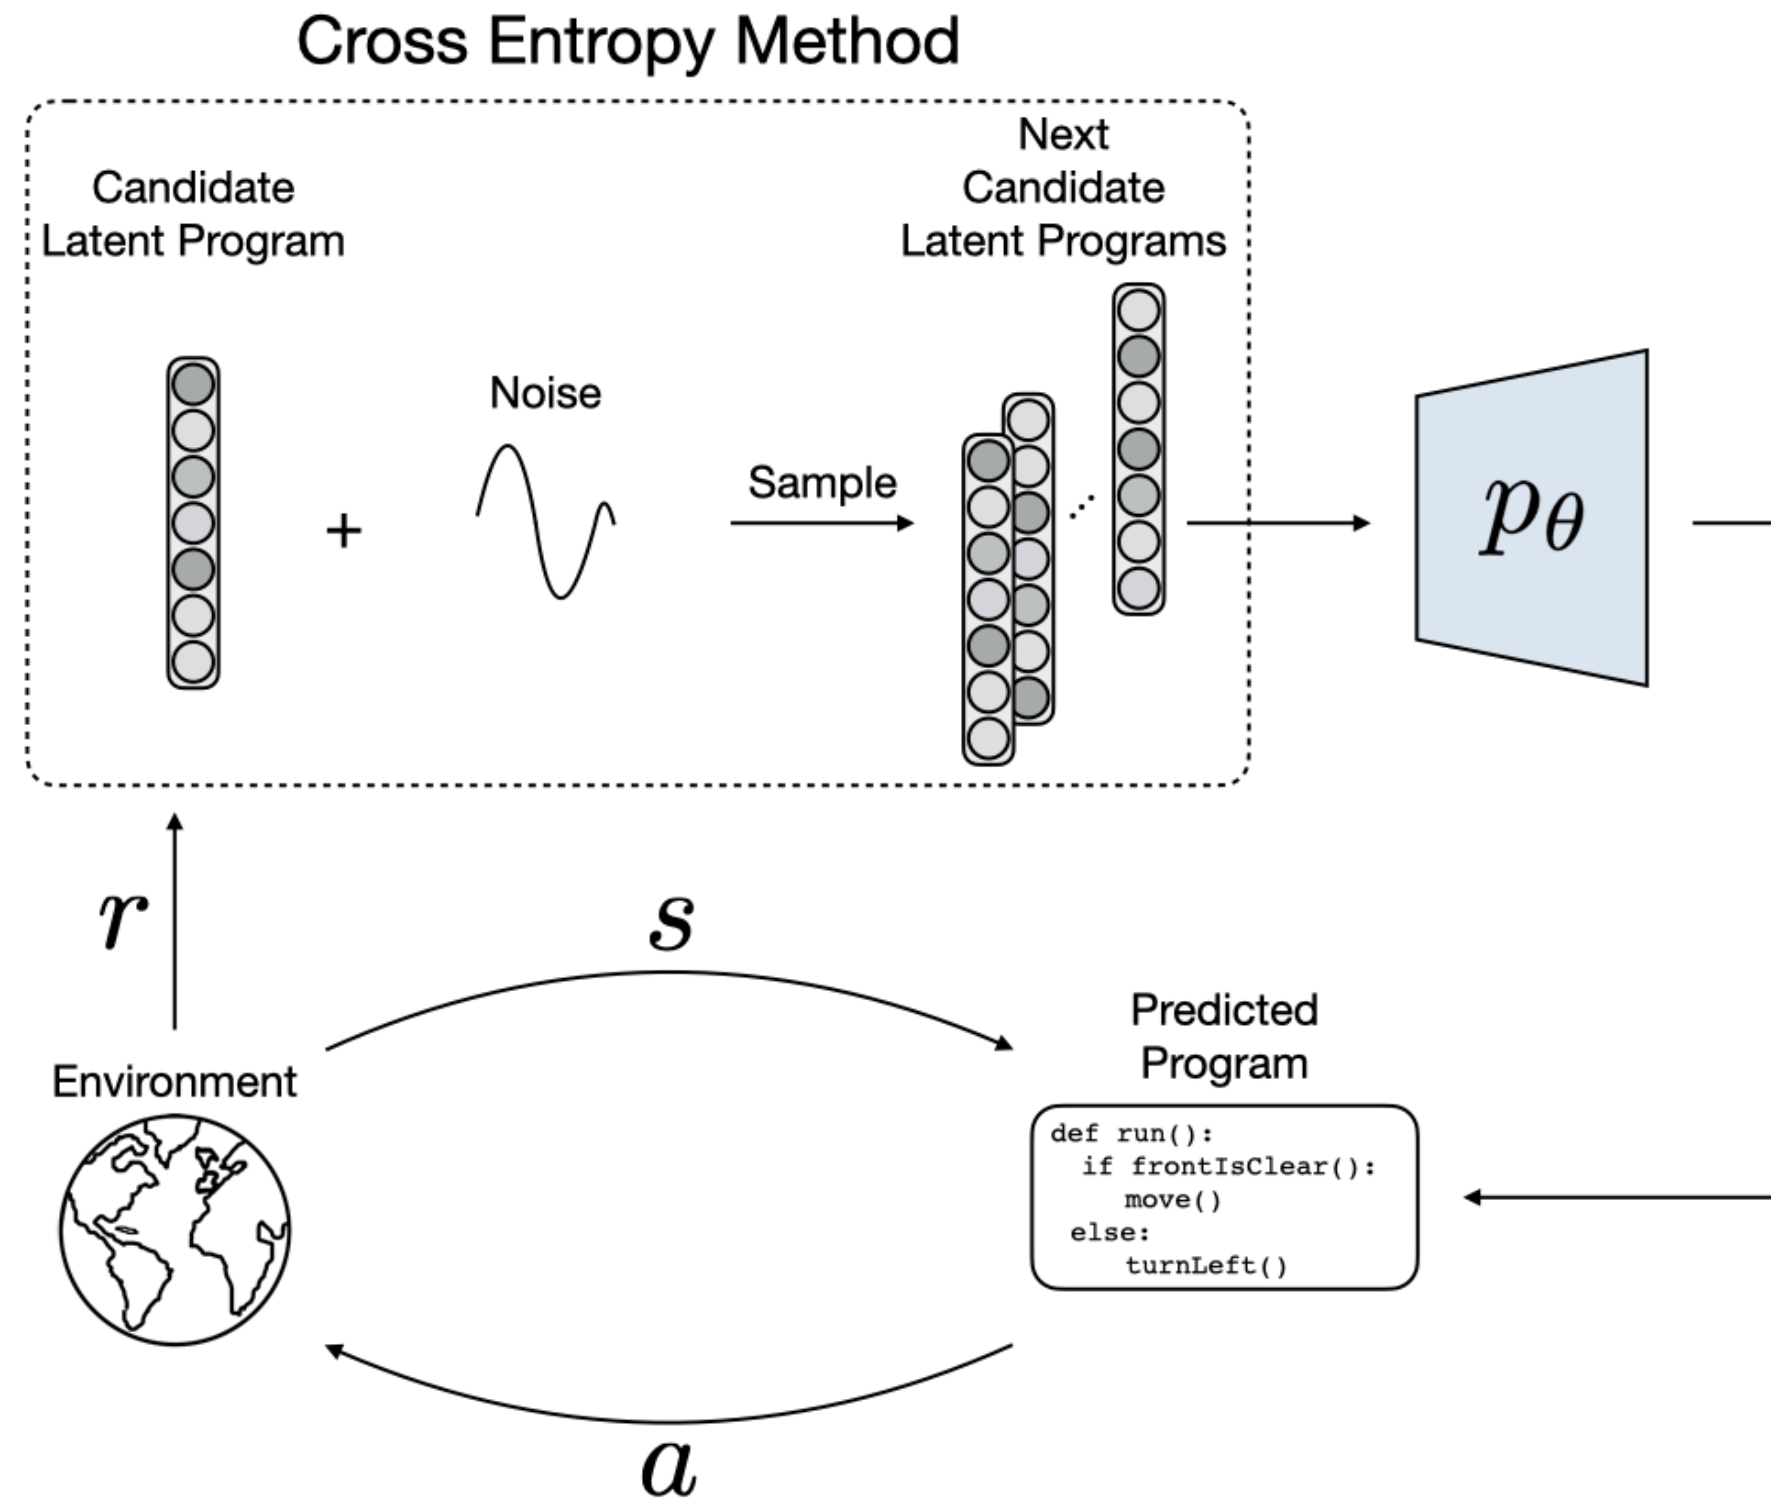

# Karel Tasks

---

StairClimber

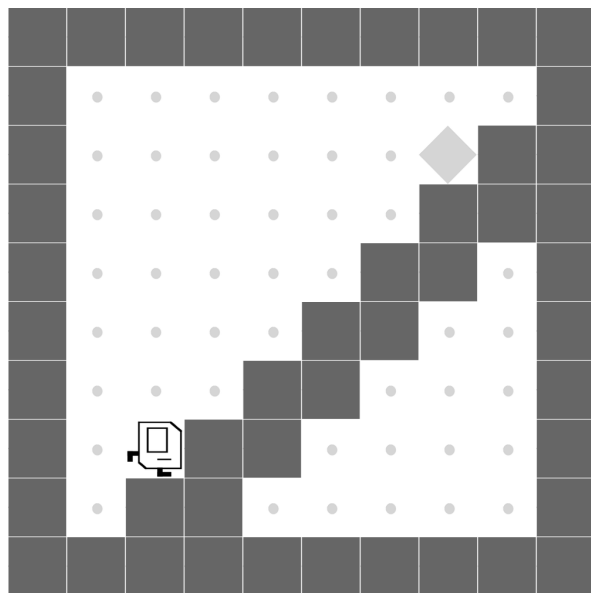

Maze

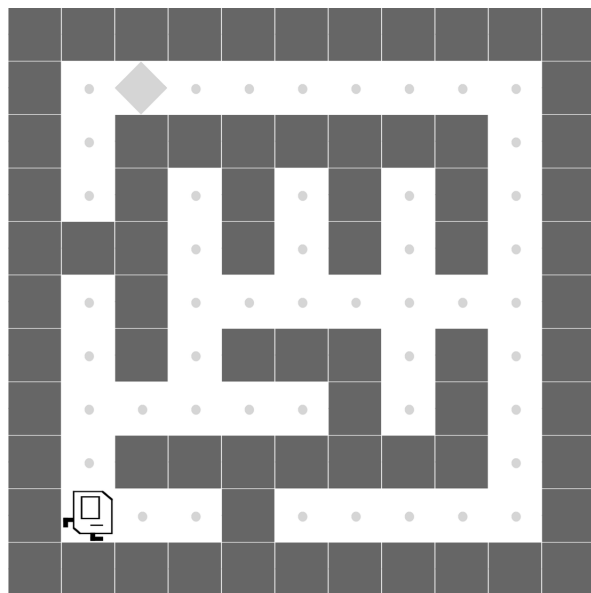

FourCorners

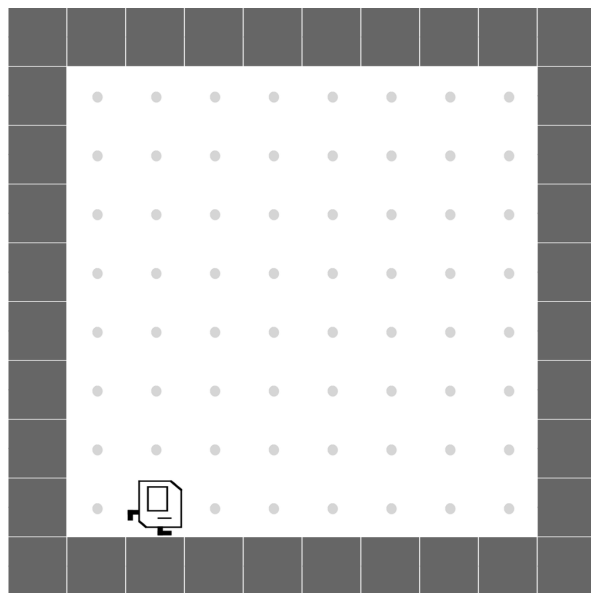

TopOff

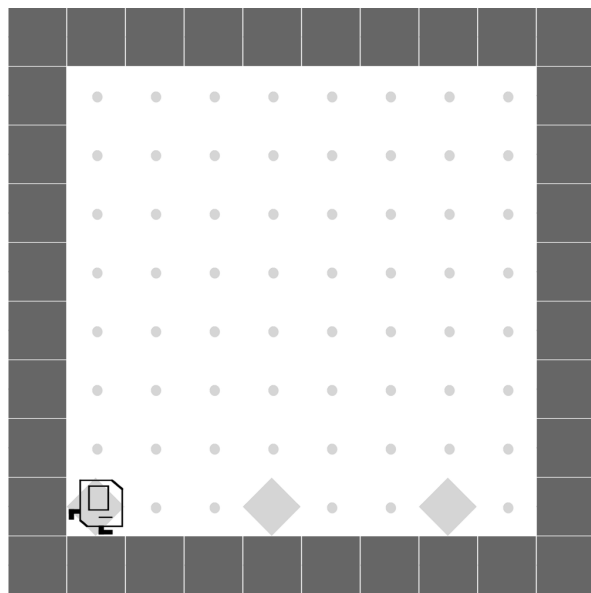

# Karel Tasks

---

StairClimber

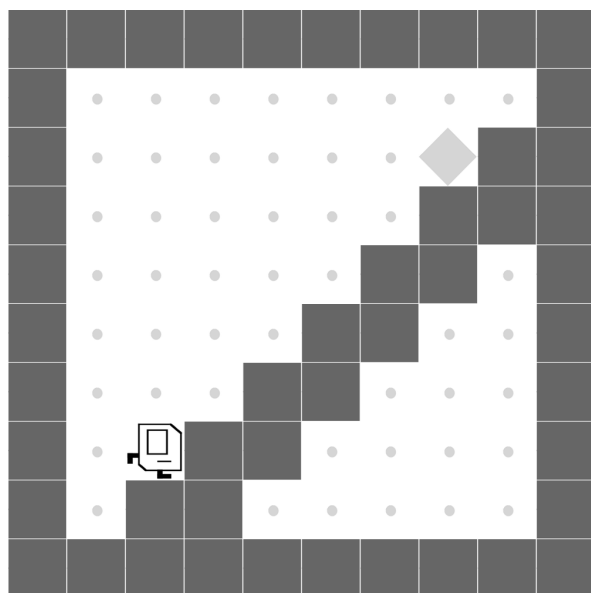

Maze

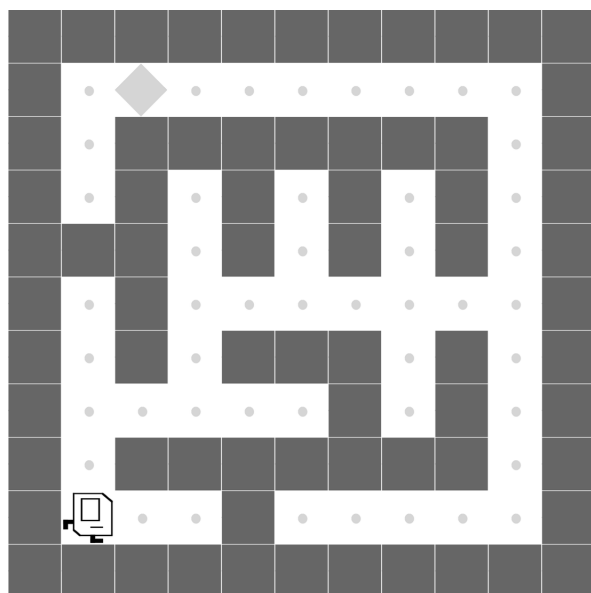

FourCorners

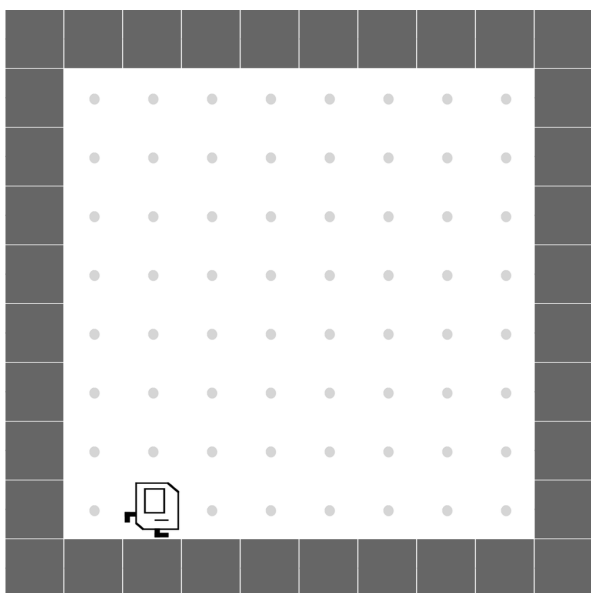

TopOff

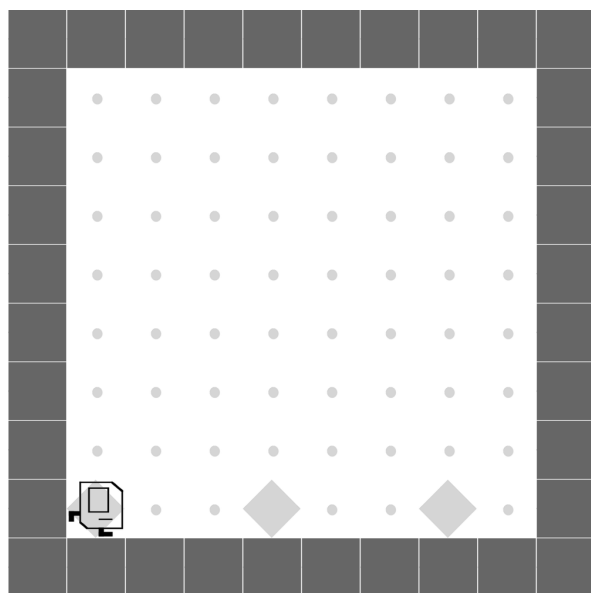

CleanHouse

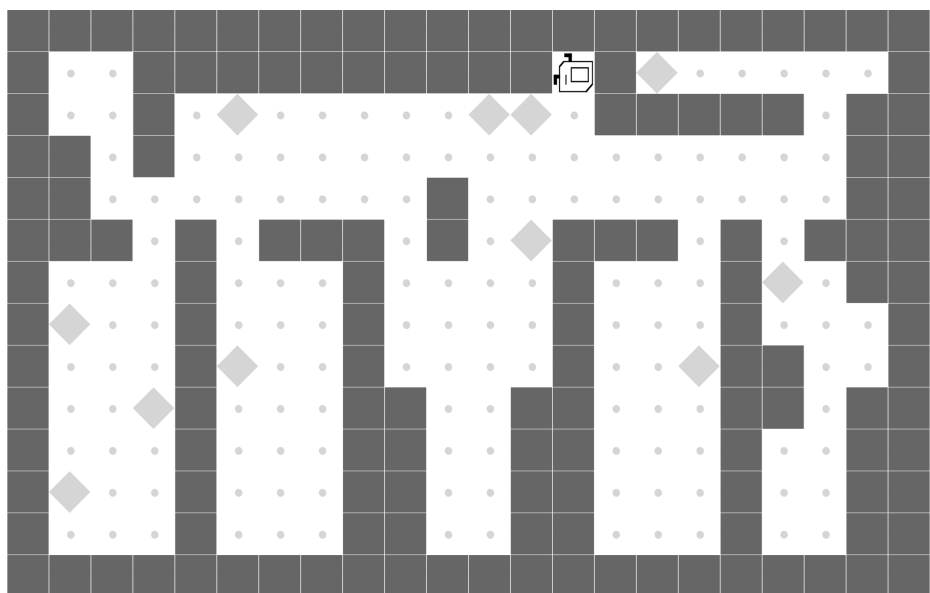

# Karel Tasks

---

StairClimber

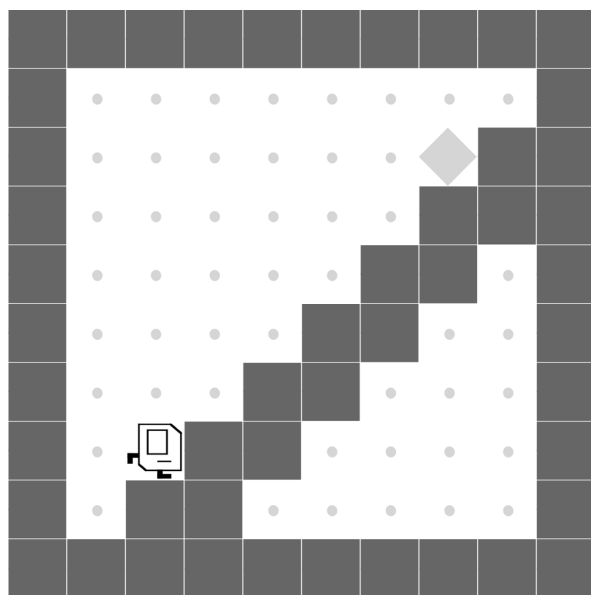

Maze

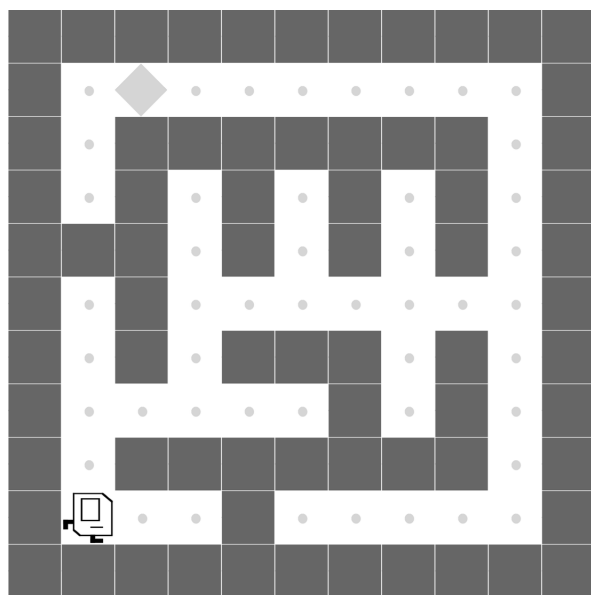

FourCorners

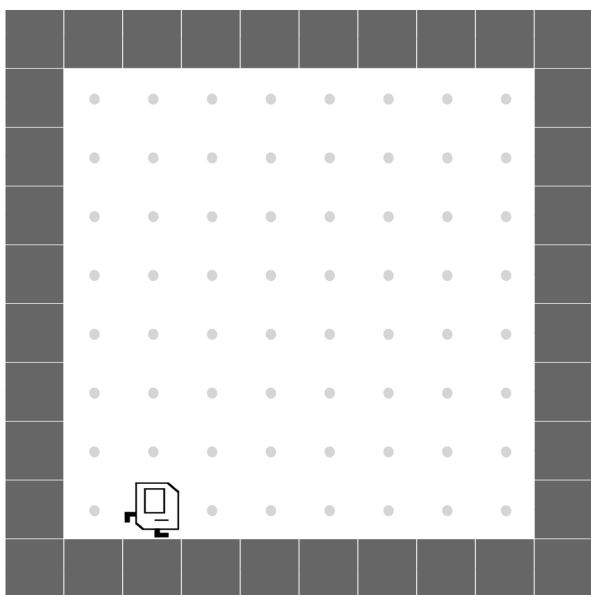

TopOff

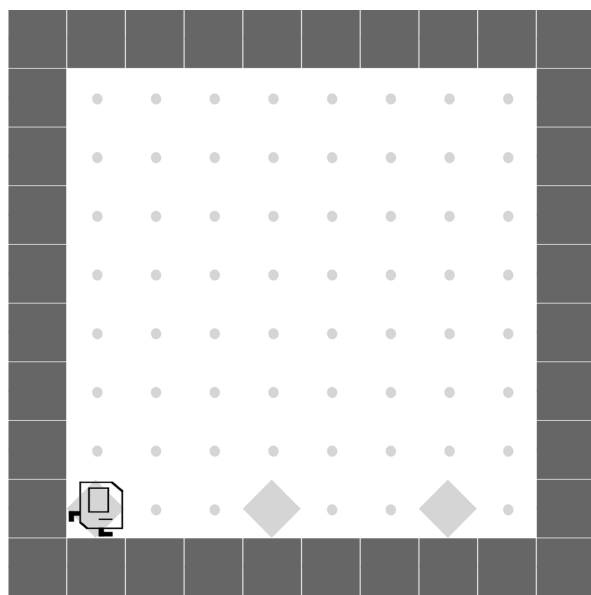

CleanHouse

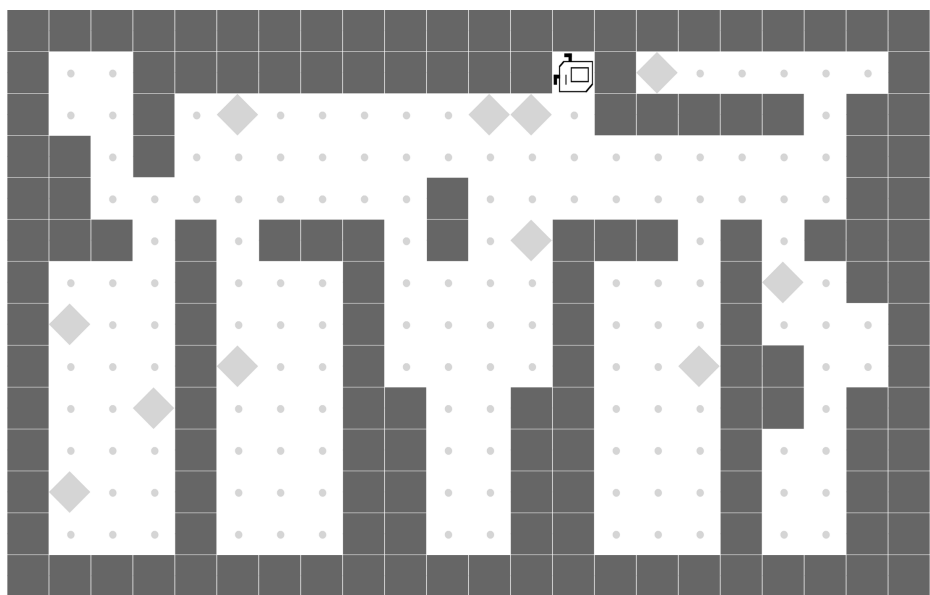

Harvester

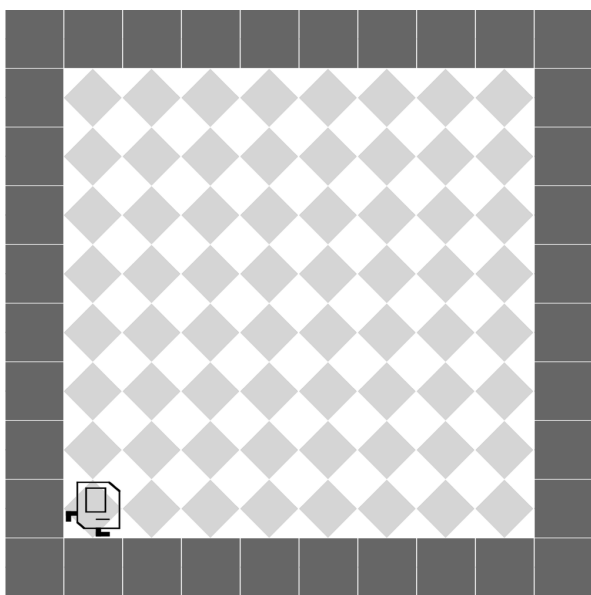

# Baselines

## DRL

Raw State

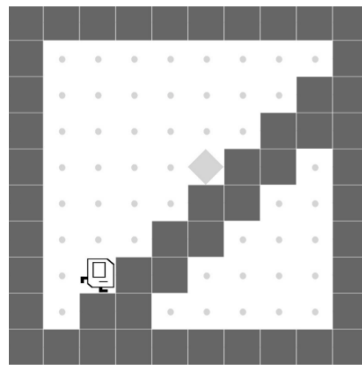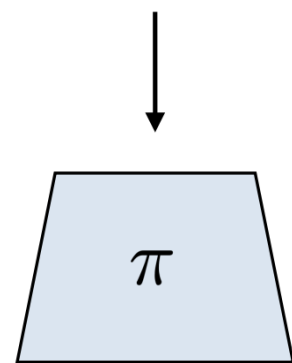

$a$

## VIPER (Decision Tree)

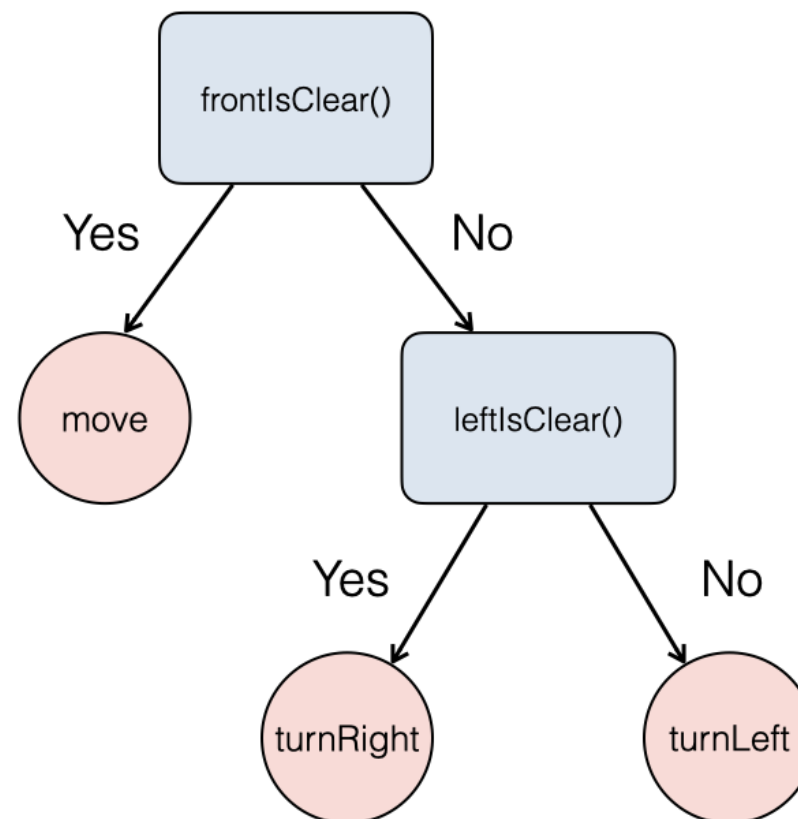

Distillation

## Naive Program Synthesis

startToken

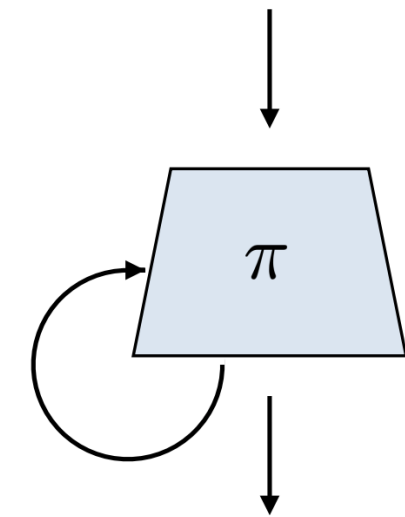

Program Token Generated at t

turnLeft()

Program Synthesized So Far

```
def run():
  if frontIsClear():
    move()
  else:
    turnLeft()
    ⋮
```

# Results

---

## StairClimber

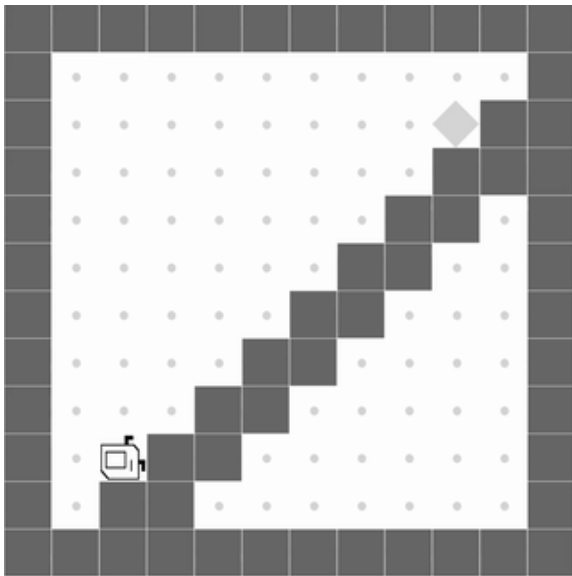

DRL

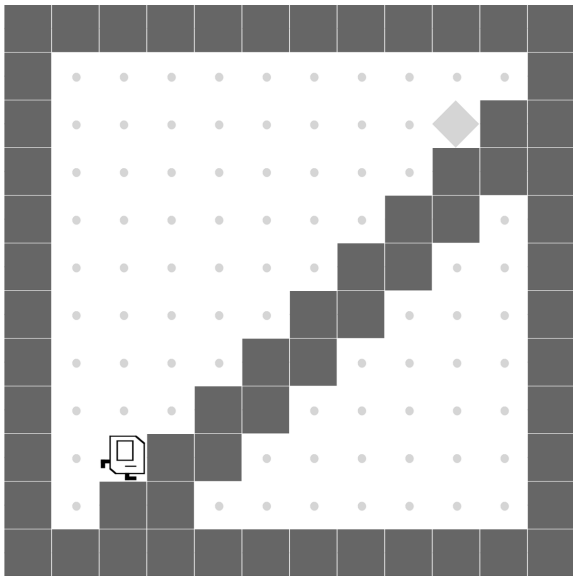

LEAPS

# Results

---

## StairClimber

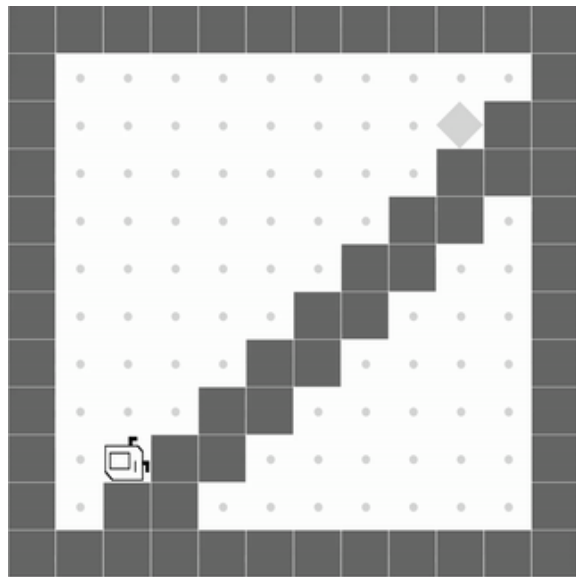

DRL

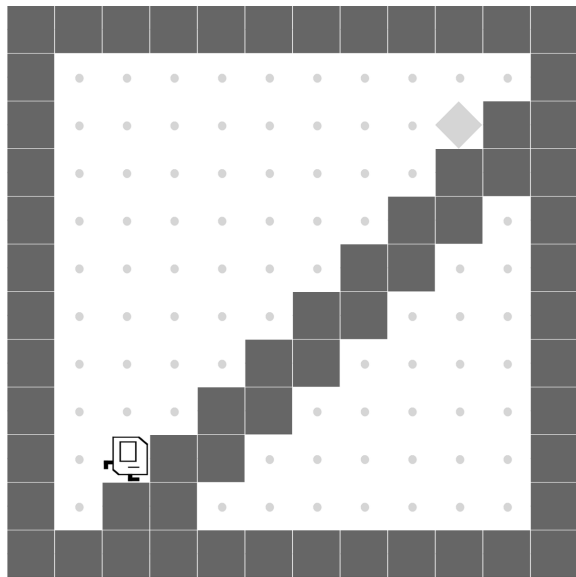

LEAPS

## Maze

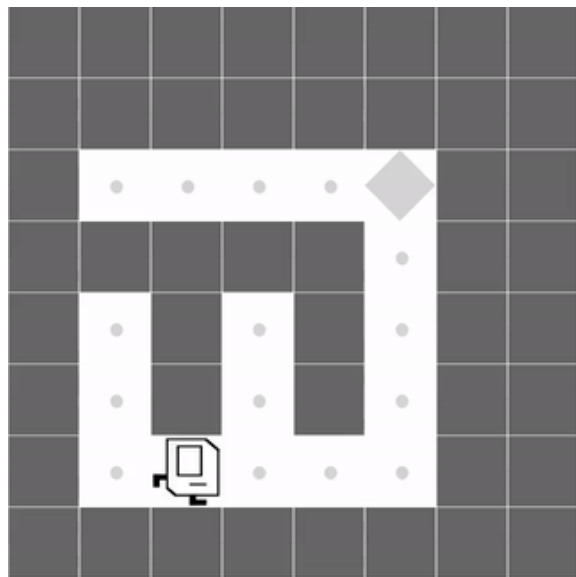

DRL

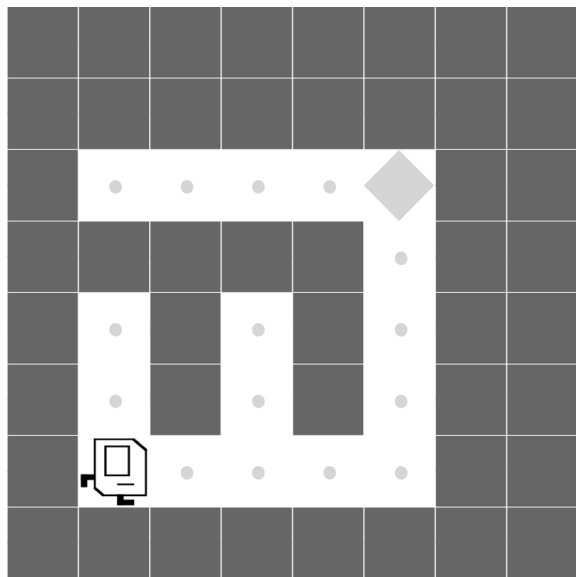

LEAPS

# Results

---

StairClimber

FourCorners



DRL

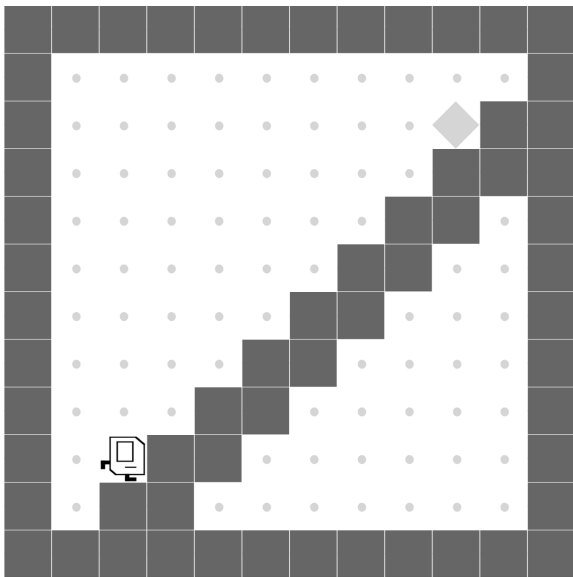

LEAPS

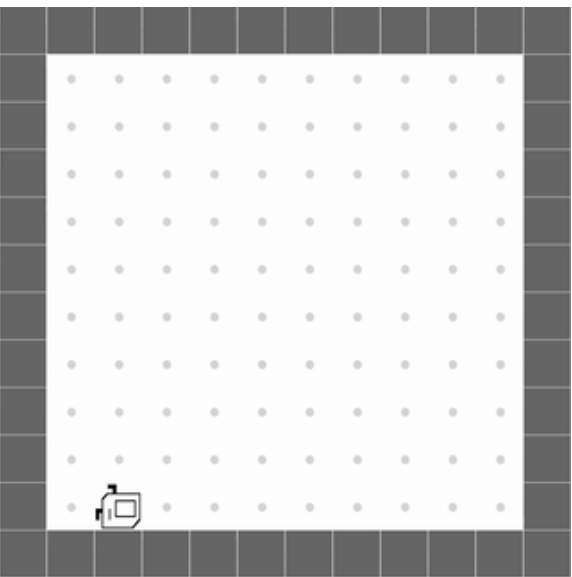

DRL

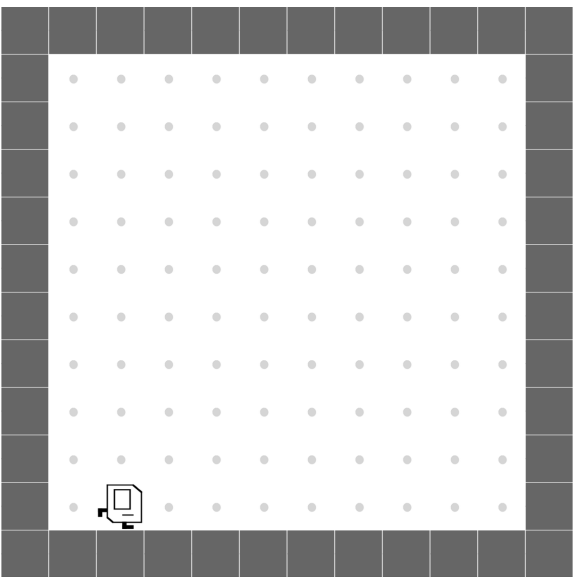

LEAPS

Maze



DRL

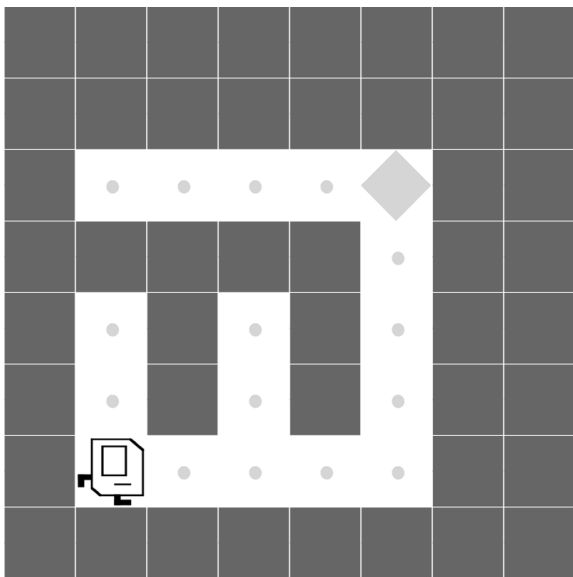

LEAPS

# Results

---

StairClimber

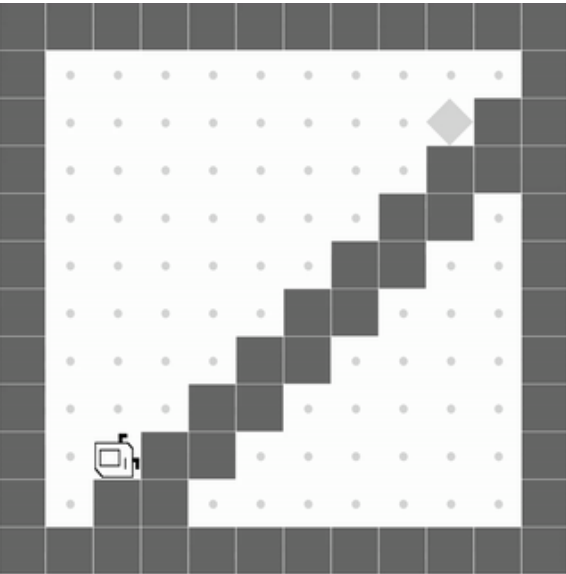

DRL

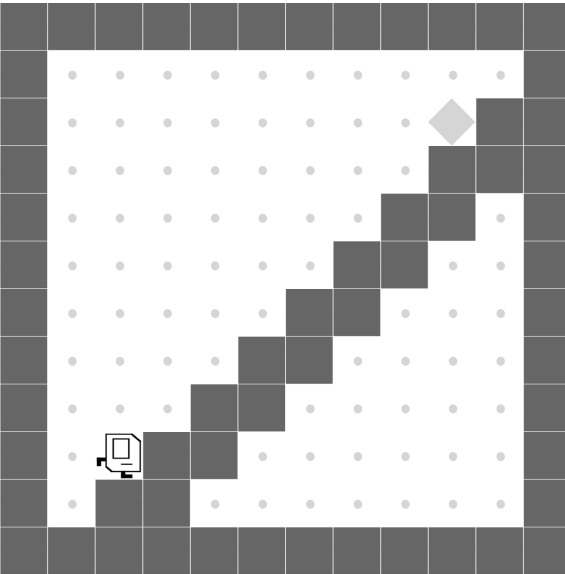

LEAPS

FourCorners

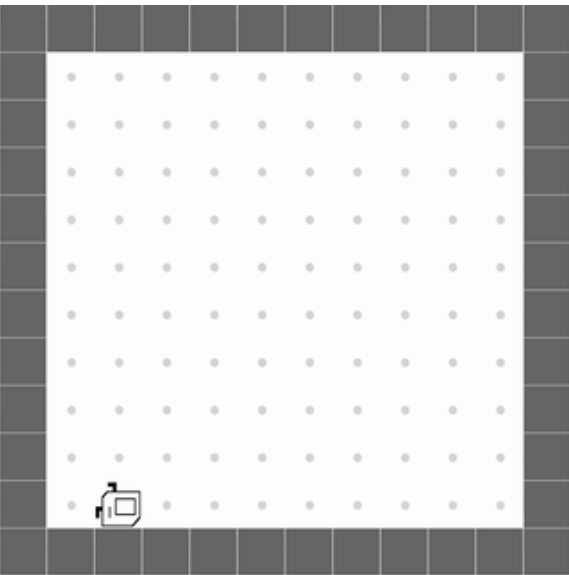

DRL

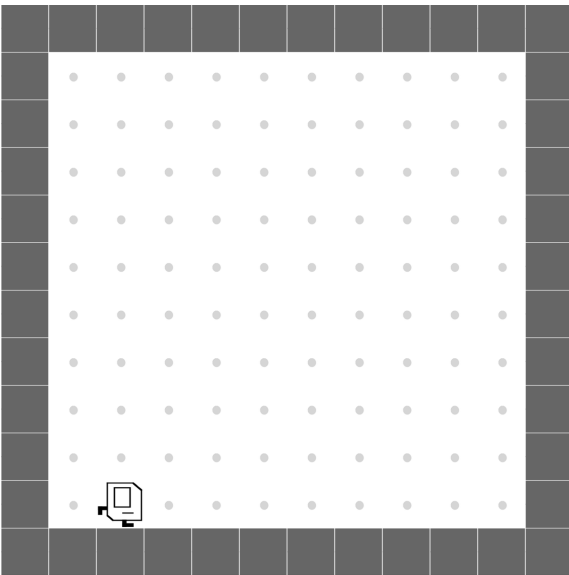

LEAPS

Maze

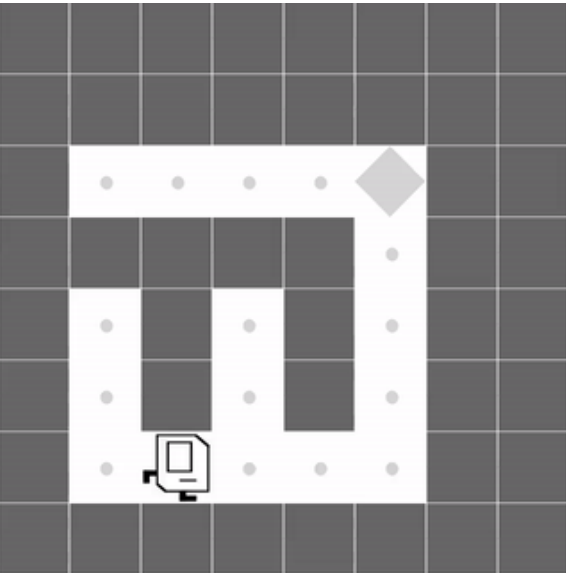

DRL

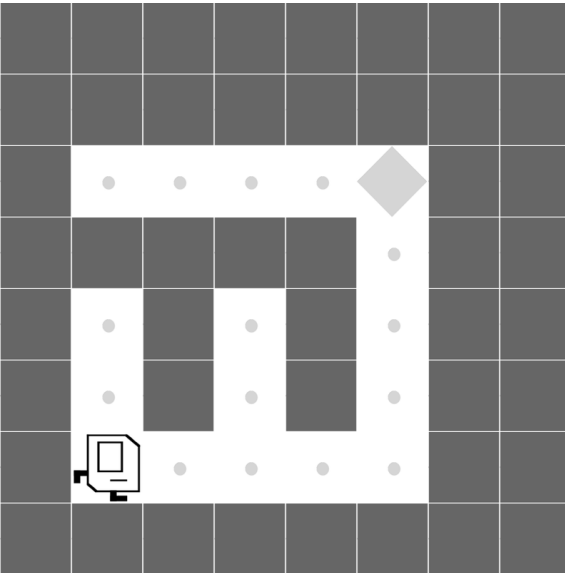

LEAPS

TopOff

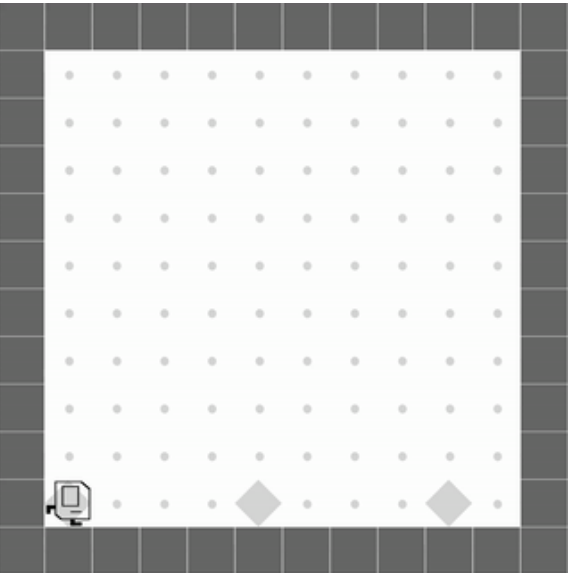

DRL

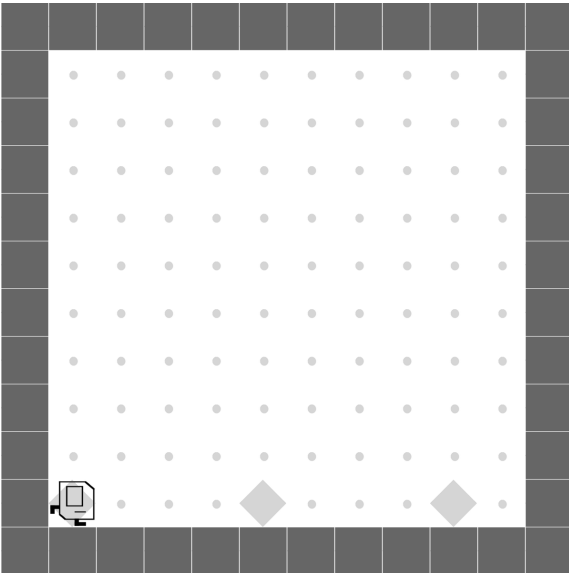

LEAPS

# Results

---

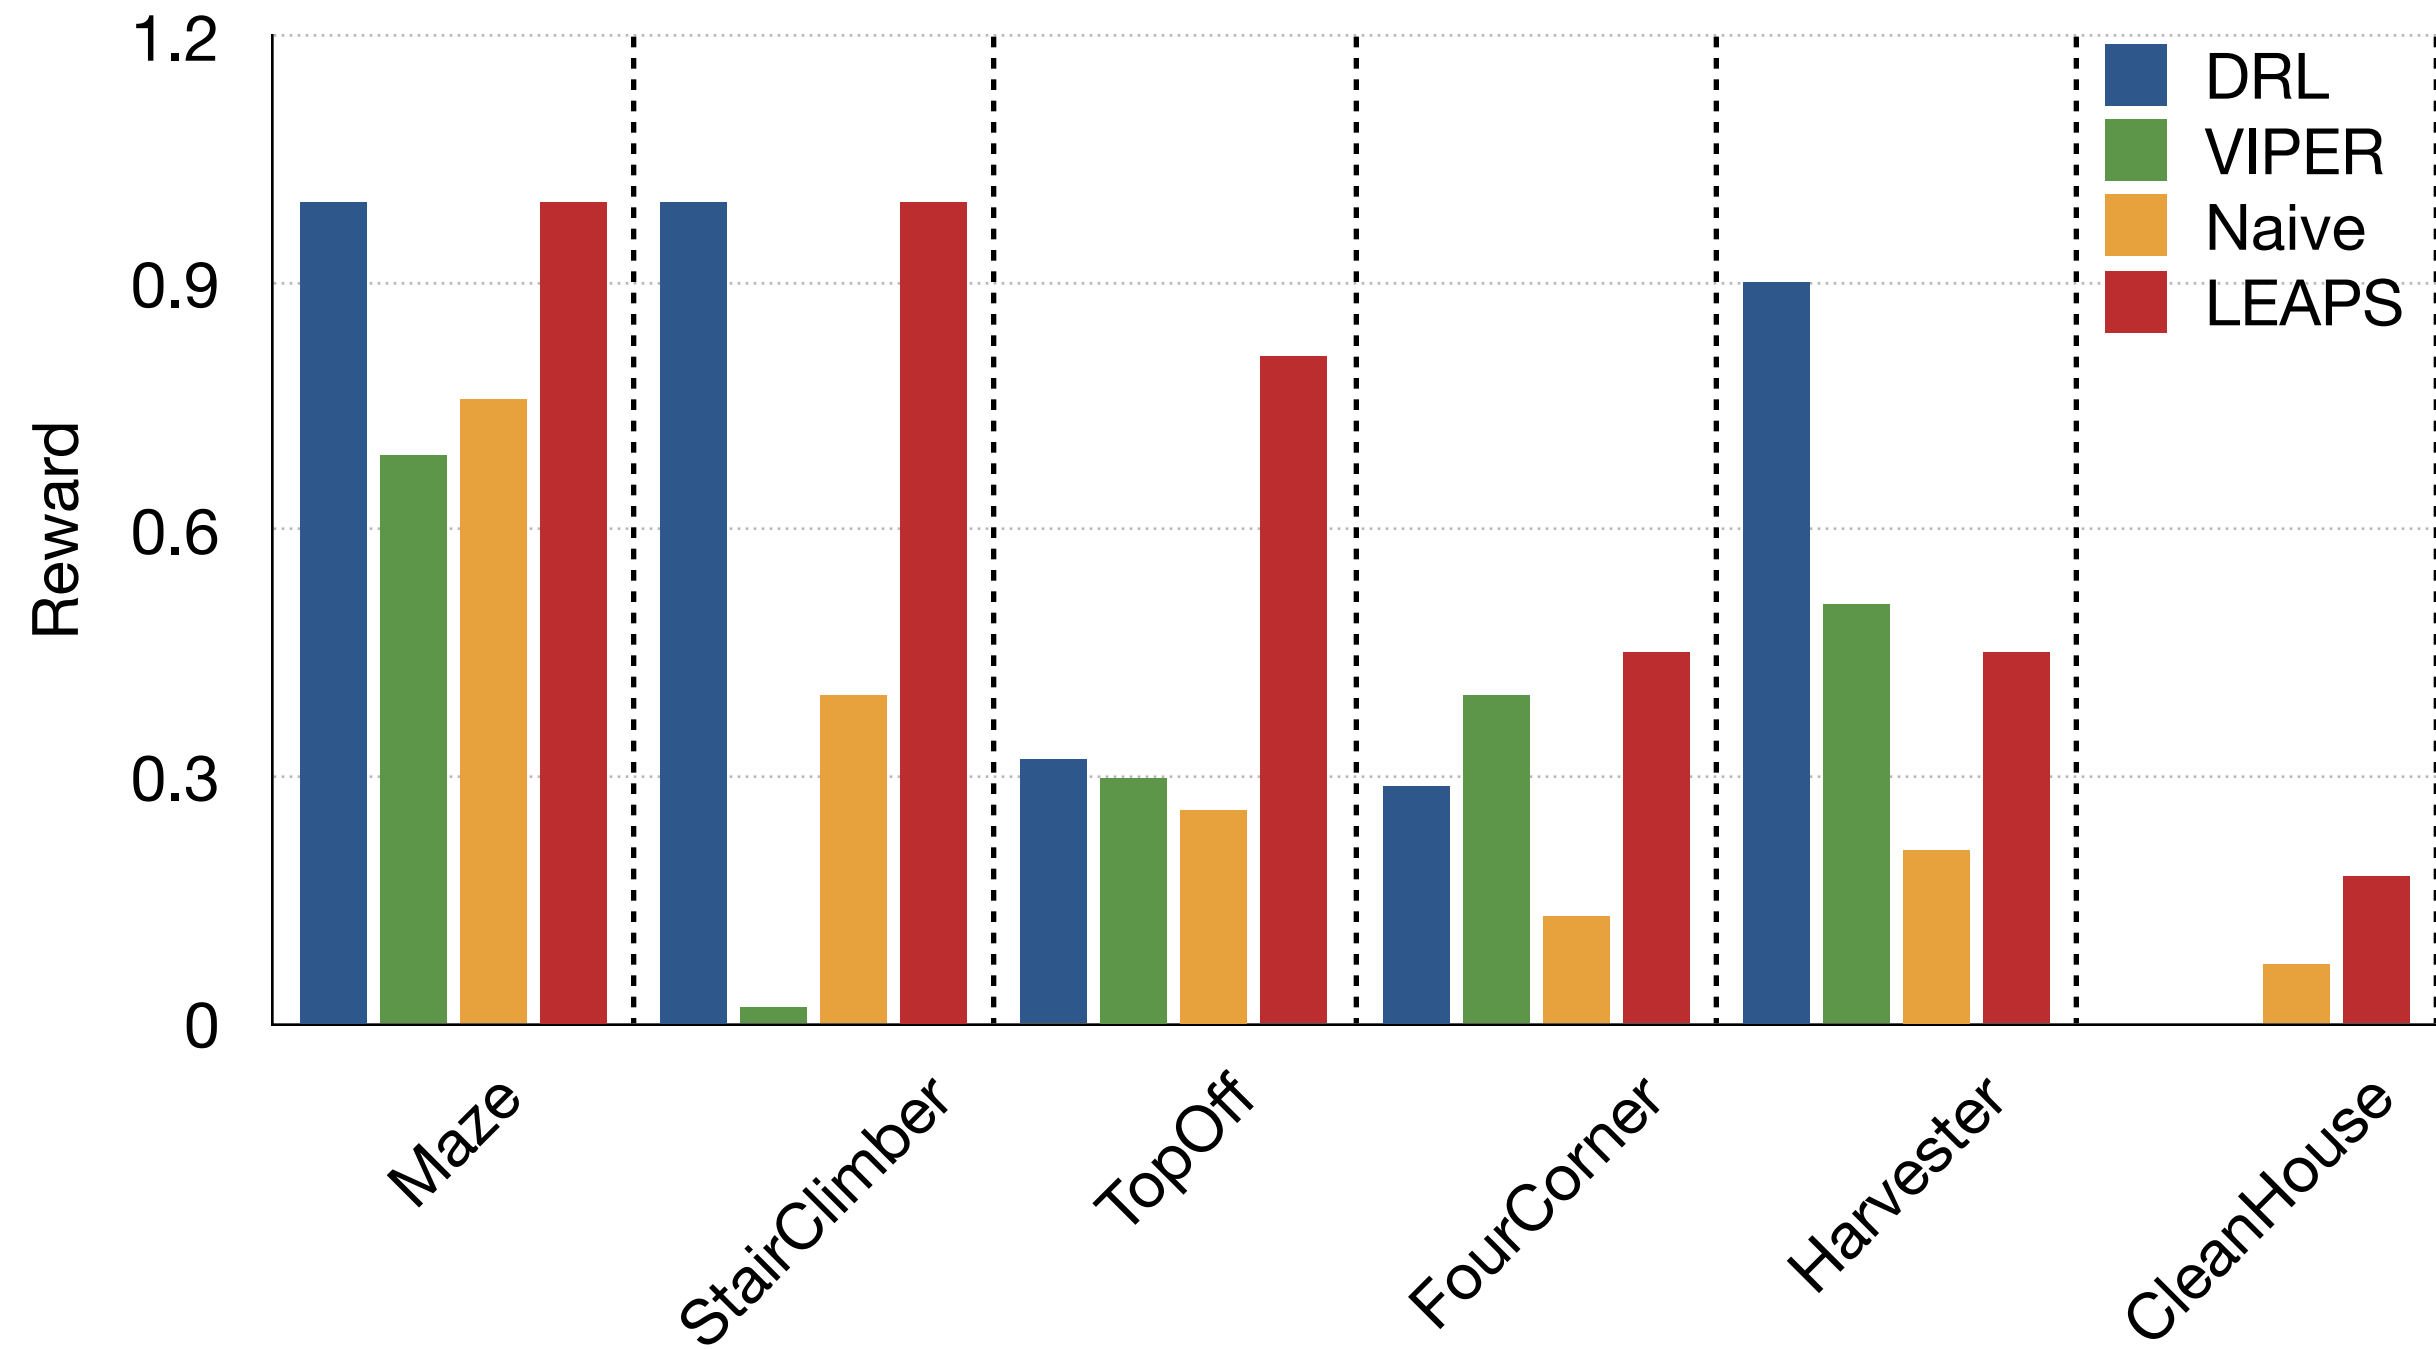

# Results - CEM trajectory Visualization

---

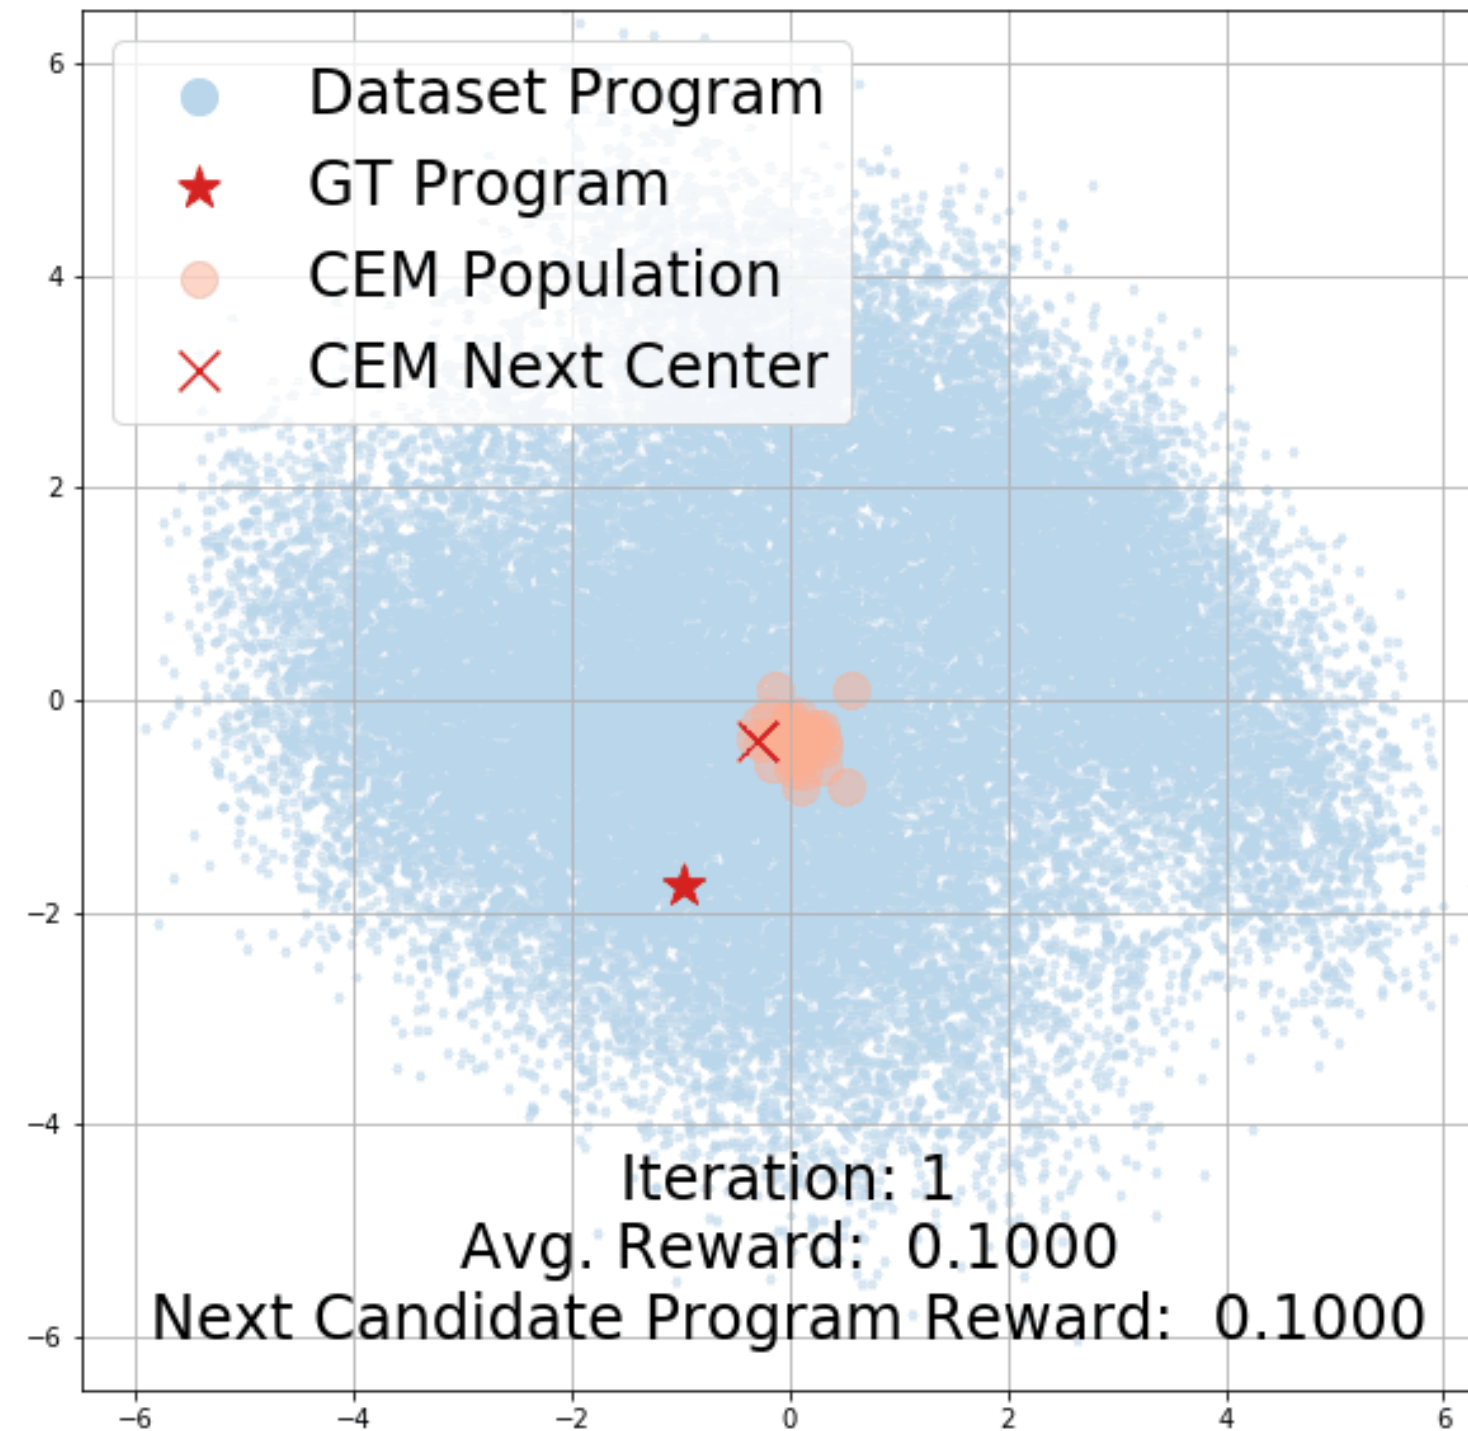

# Zero-shot Generalization

---

## Learning

StairClimber

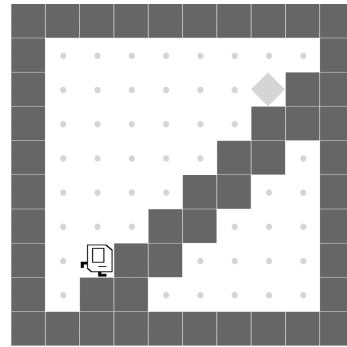

Maze

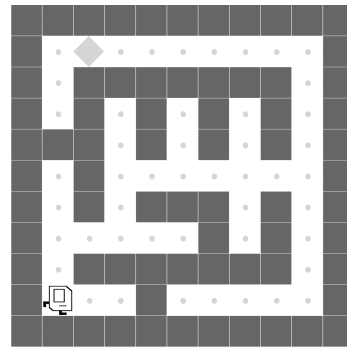

# Zero-shot Generalization

---

Learning

Evaluation on 100 x 100

StairClimber

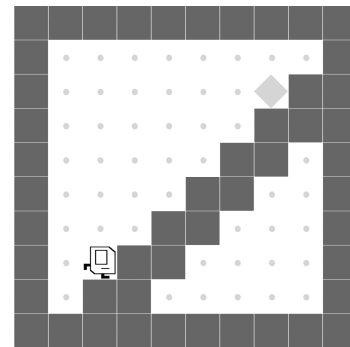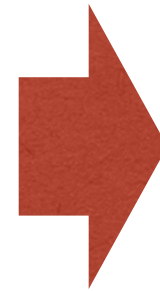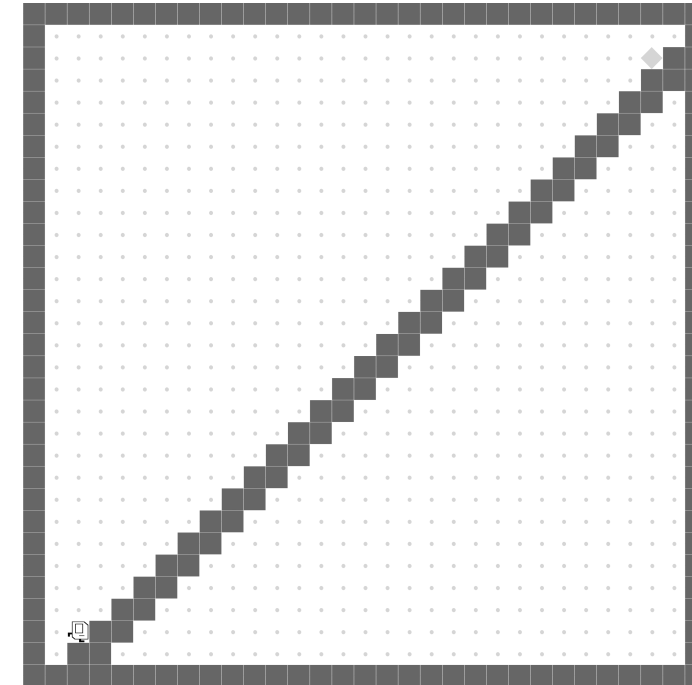

Maze

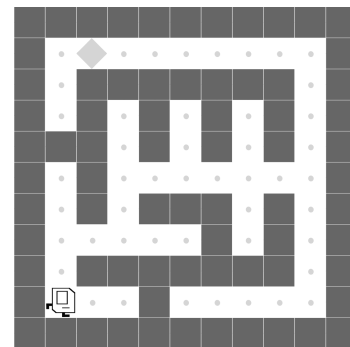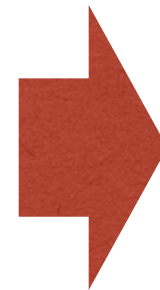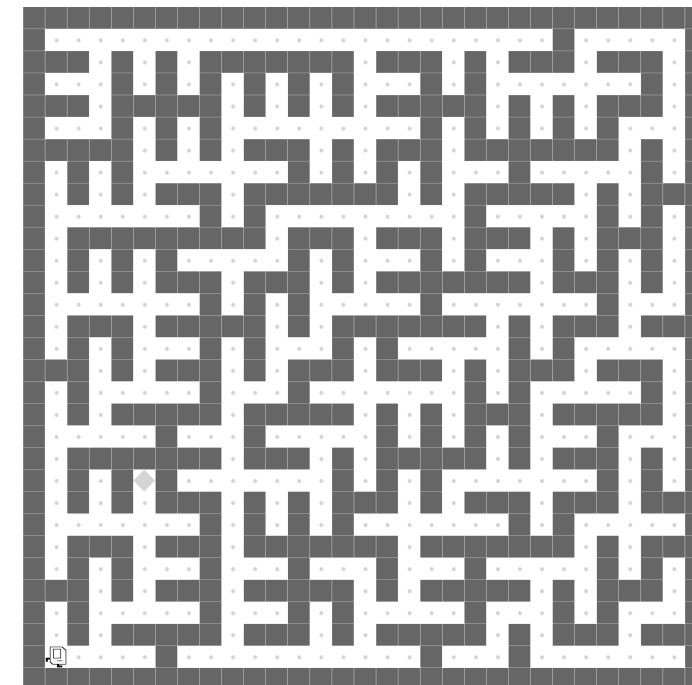

# LEAPS Zero-shot Generalization

---

## Learning

StairClimber

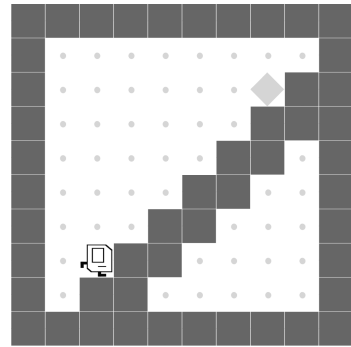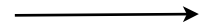

CEM search

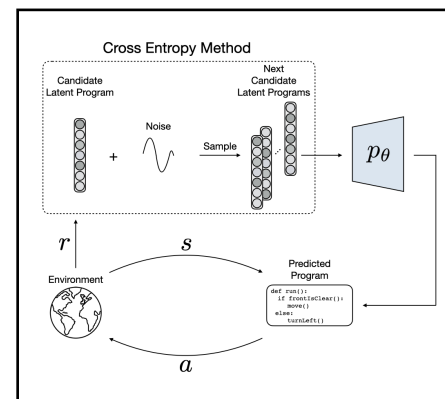

Maze

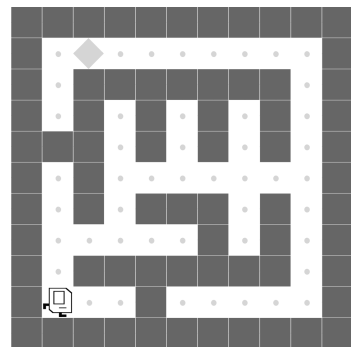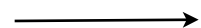

CEM search

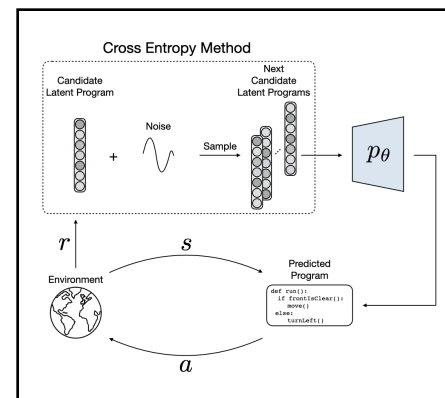

# LEAPS Zero-shot Generalization

## Learning

## LEAPS policy

StairClimber



CEM search

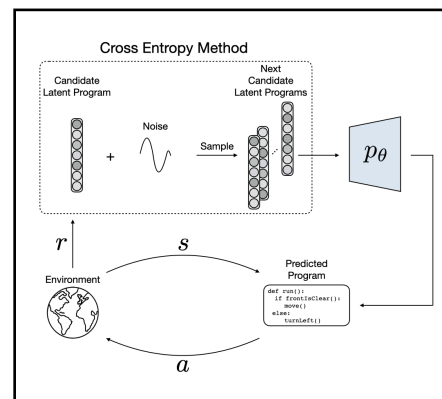

```
DEF run()  
  WHILE noMarkersPresent()  
    turnRight  
    move  
  WHILE rightIsClear()  
    turnLeft
```

Maze



CEM search

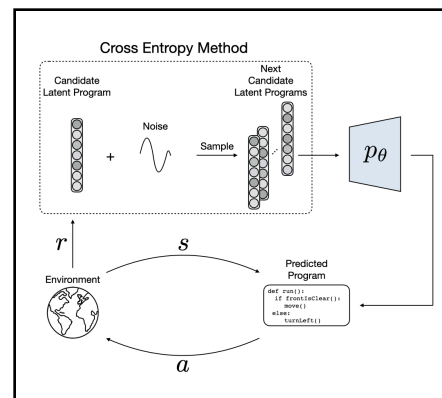

```
DEF run()  
  IF frontIsClear()  
    turnLeft  
  WHILE noMarkersPresent()  
    turnRight  
    move
```

# LEAPS Zero-shot Generalization

## Learning

StairClimber

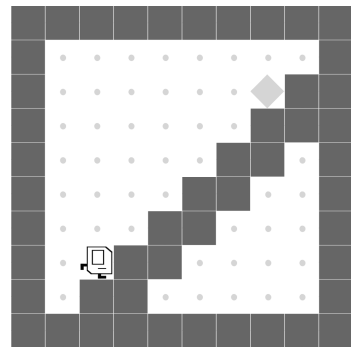

CEM search

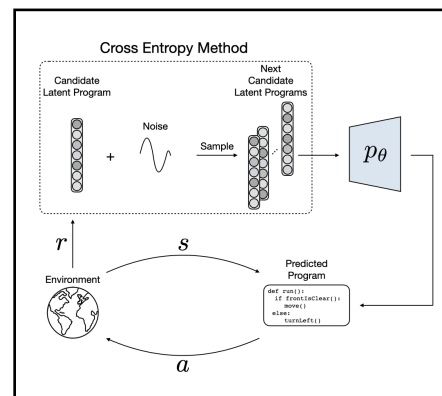

## LEAPS policy

```
DEF run()  
  WHILE noMarkersPresent()  
    turnRight  
    move  
  WHILE rightIsClear()  
    turnLeft
```

## Evaluation on 100 x 100

Maze

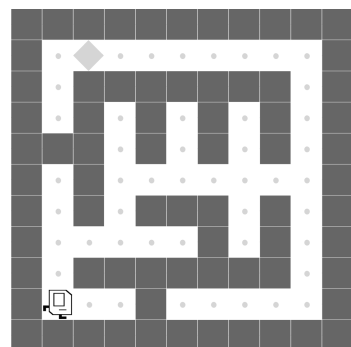

CEM search

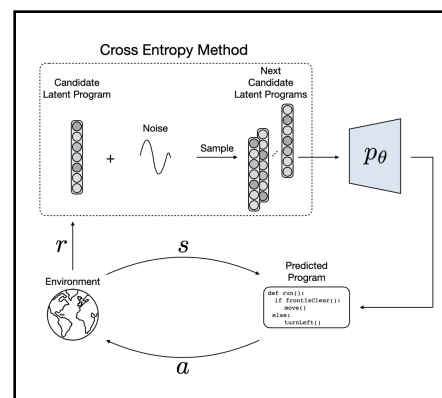

```
DEF run()  
  IF frontIsClear()  
    turnLeft  
  WHILE noMarkersPresent()  
    turnRight  
    move
```

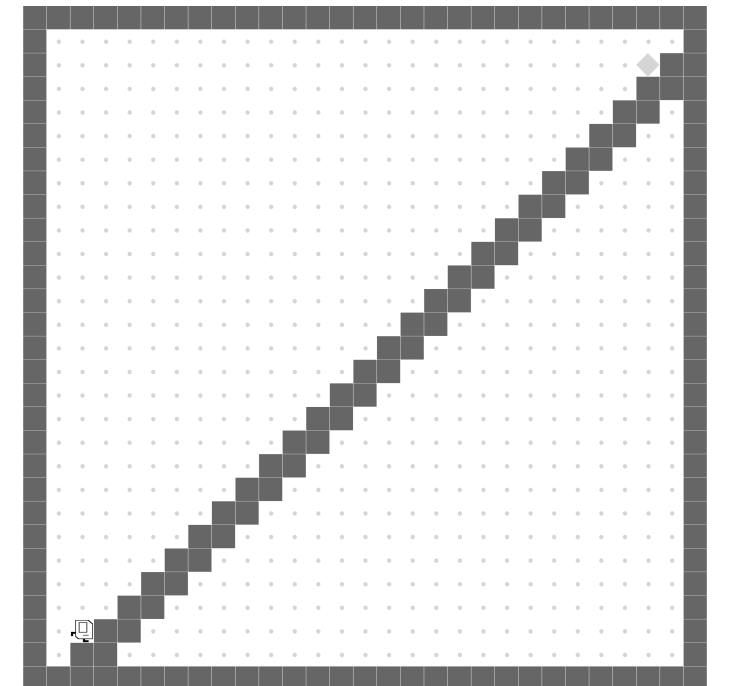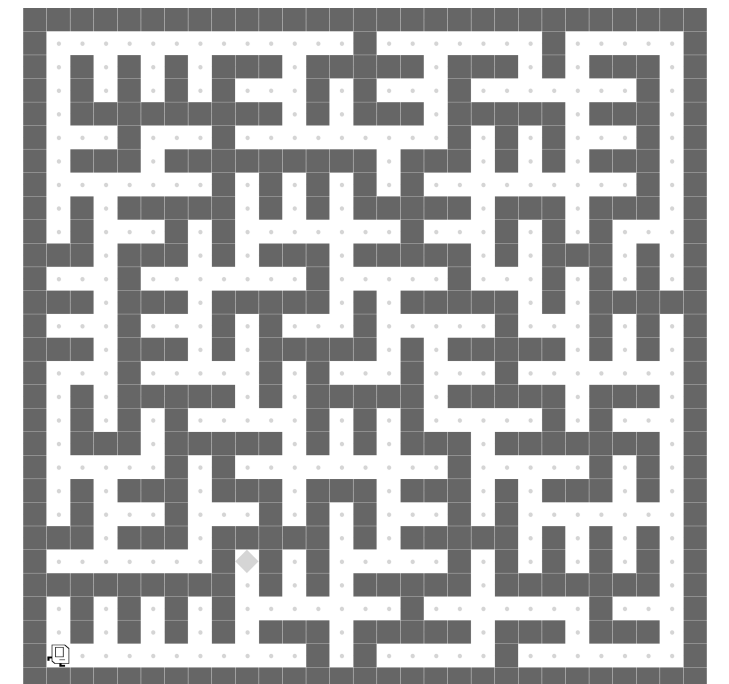

# Results - Zero-shot Generalization

---

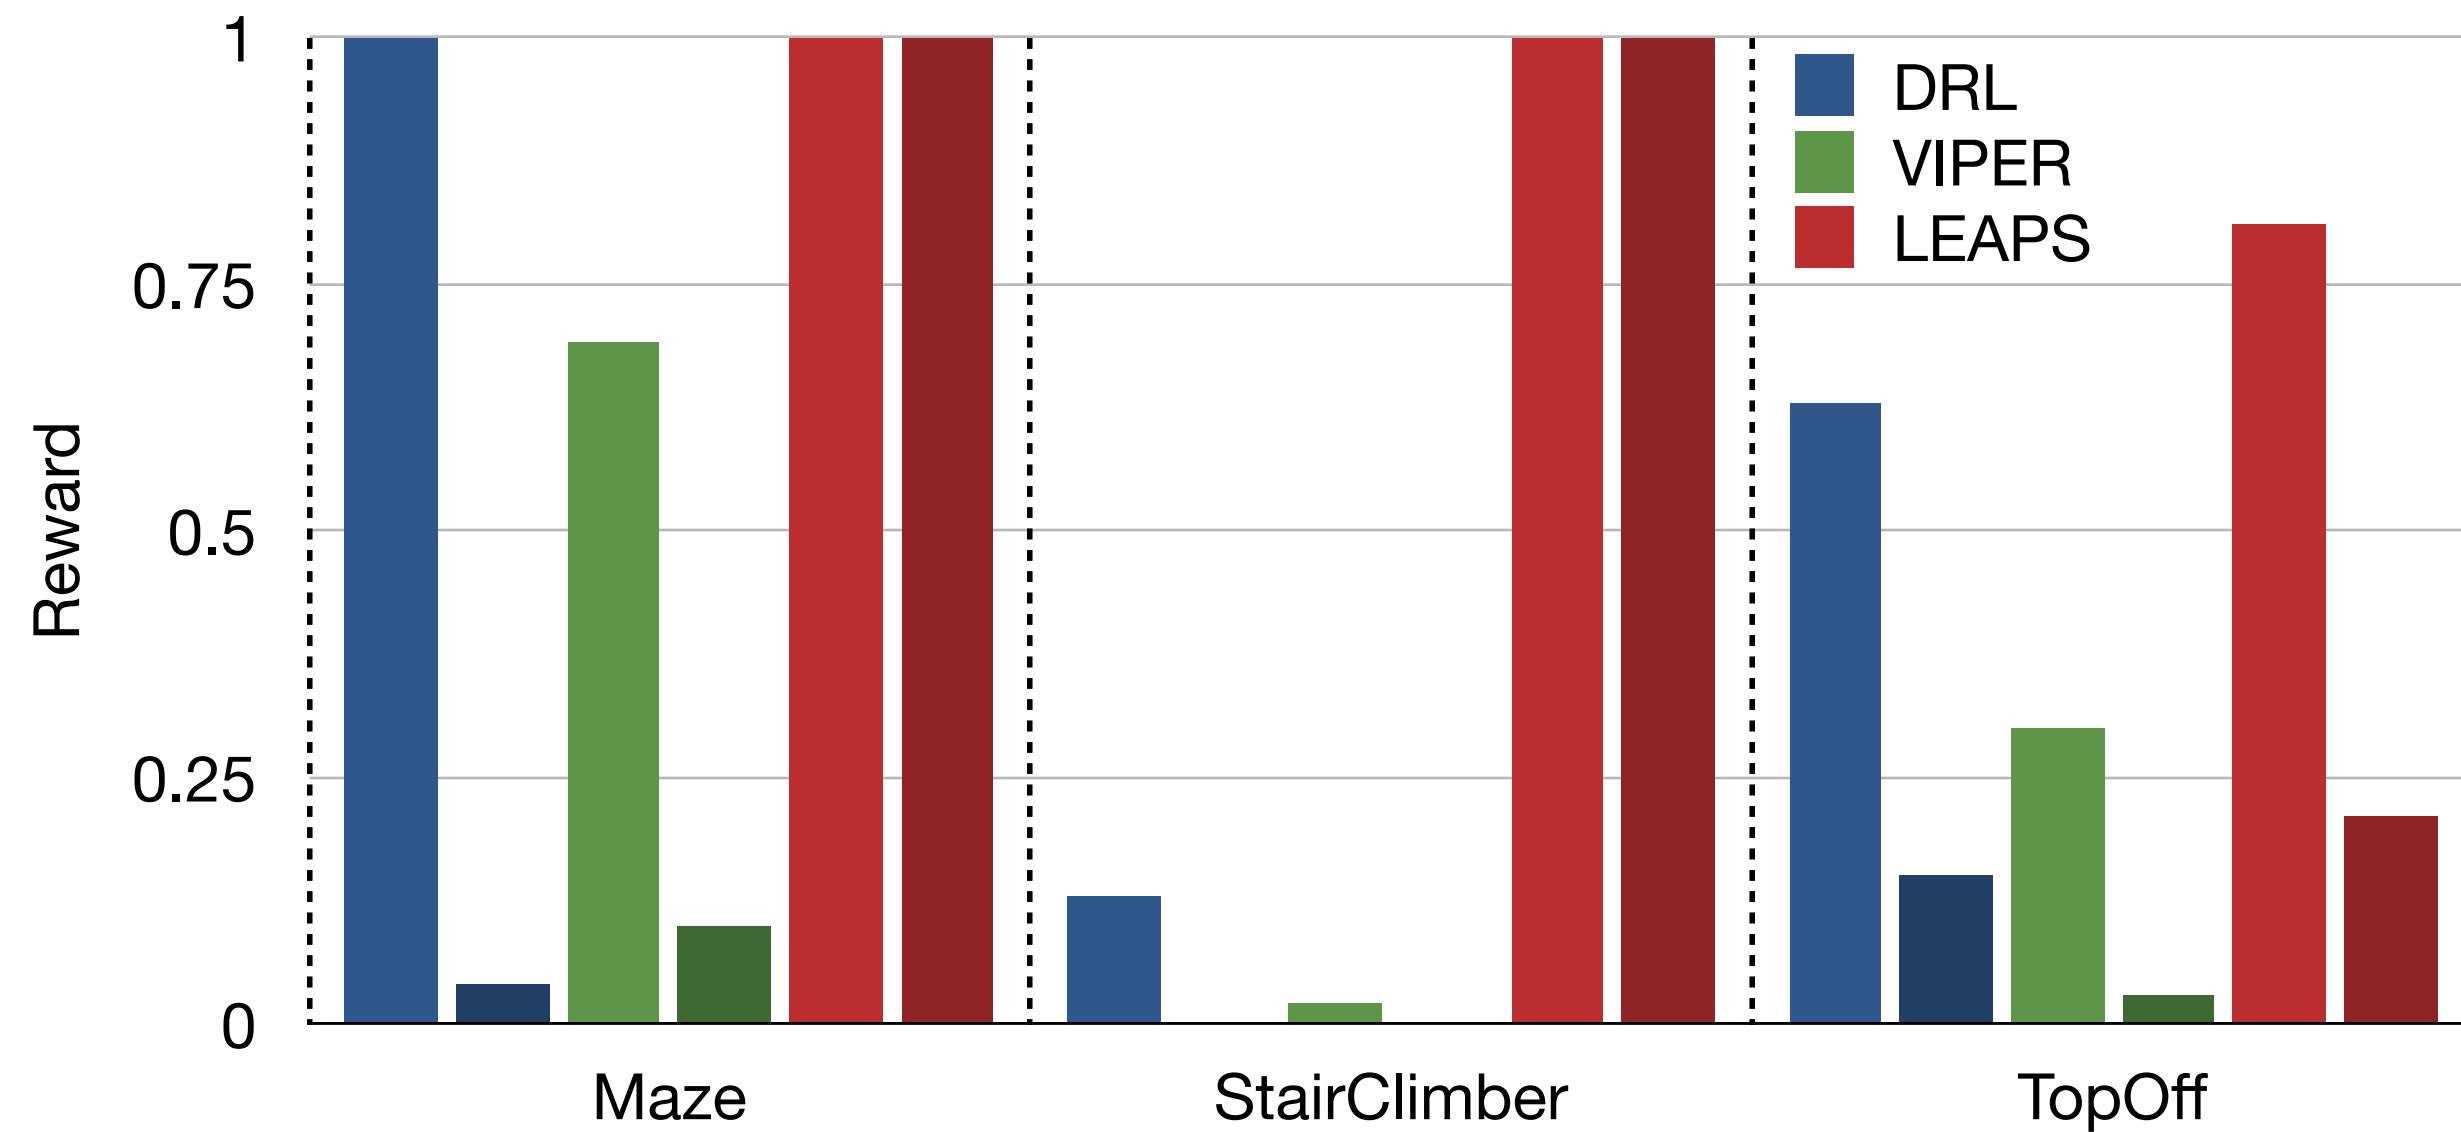

# Human Debugging Interface

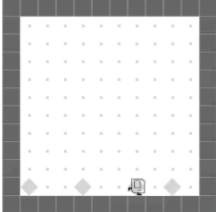

Input Program:

```
DEF run m(  
  WHILE c( noMarkersPresent c) w(  
    turnRight  
    move  
  w)  
  putMarker  
  move  
  WHILE c( noMarkersPresent c) w(  
    turnRight  
    move  
  w)  
  putMarker  
  move  
  WHILE c( noMarkersPresent c) w(  
    turnRight  
    move  
  w)  
  putMarker  
  move  
  WHILE c( noMarkersPresent c) w(  
    turnRight  
    move  
  w)  
  putMarker  
  move  
m)
```

Reset Code (Made a mistake?)

Issue with Code?

Submit Code (Runs your program!)

New Reward:

Orig Reward:

Best Reward

# Performance Improvement

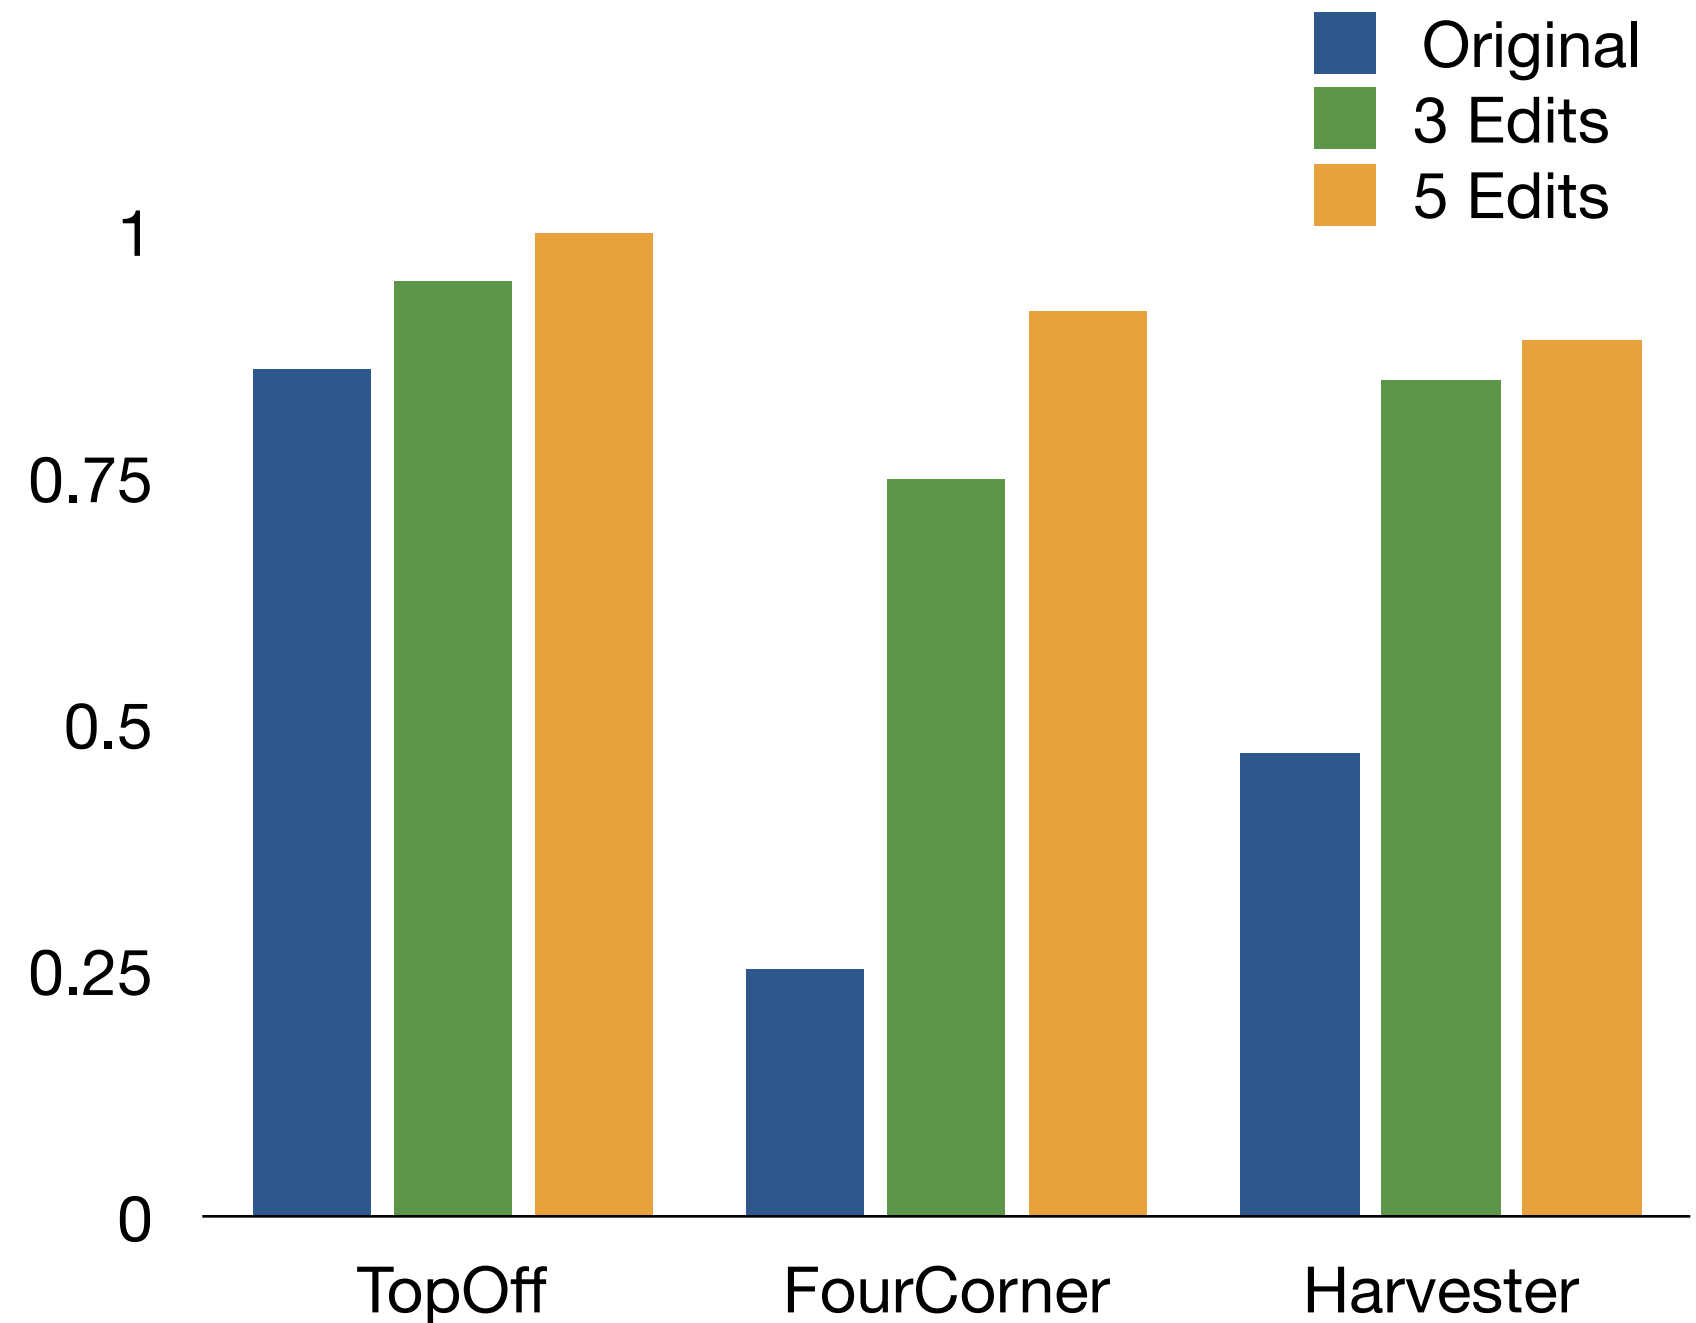

# Takeaways

---

- We learn to synthesize a program as a policy purely from reward
- We first learn a program embedding space and then search for a task-solving program
- Our synthesized programs achieve good performance, and are more generalizable and interpretable

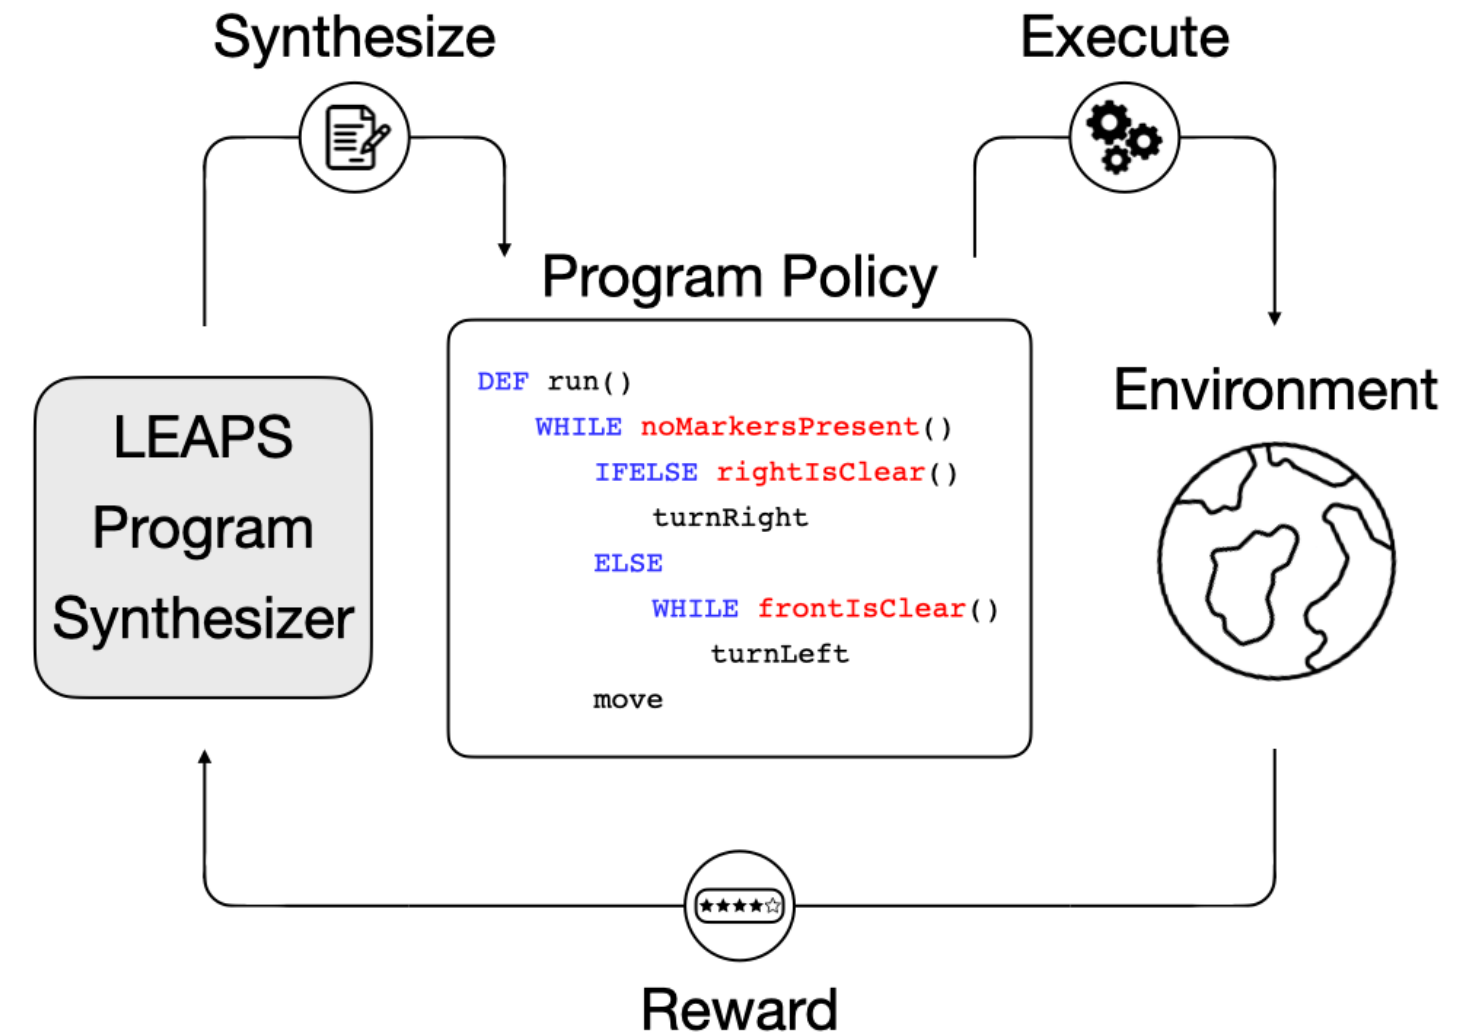

# Learning to Synthesize Programs as Interpretable and Generalizable Policies

---

Dweep Trivedi\*, Jesse Zhang\*, Shao-Hua Sun\*, Joseph J Lim

For more details...

**Paper and code:** [clvr.ai.com/leaps](https://clvr.ai.com/leaps)

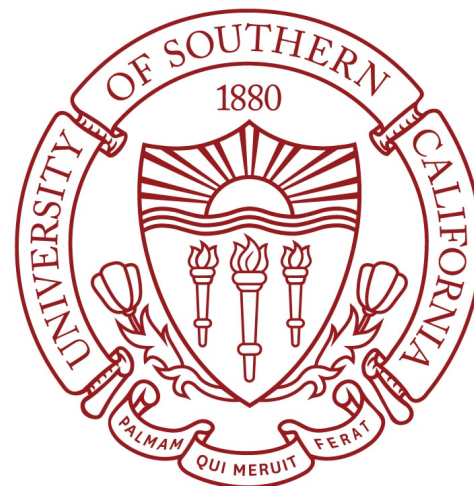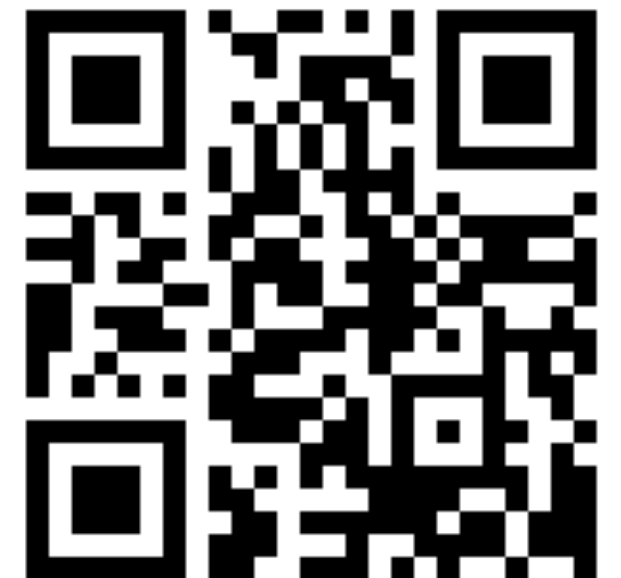

Supplement: supplementary_material [file attachment]
